# Supplementary material for: Facile ACQ-to-AIE transformation via diphenylphosphine (DPP) modification with versatile properties
Source: Royal Society of Chemistry journal article supplement (doi:10.1039/d1tc05810j), 2022-01-01

Electronic Supplementary Material (ESI) for Journal of Materials Chemistry C  
This journal is © The Royal Society of Chemistry 2021

---

Electronic Supplementary Information for

**Facile ACQ-to-AIE transformation *via* diphenylphosphine (DPP)  
modification with versatile properties**

Fangjun Ye,<sup>[a]</sup> Chengzhen Shen,<sup>[a]</sup> Jianxin Guan,<sup>[a]</sup> Yiming Liu,<sup>[a]</sup> Xiaoge Wang,<sup>[a]</sup> Jingtian Wang,<sup>[b]</sup> Ming  
Cong,<sup>[b]</sup> Weibin Wang,<sup>[b]</sup> Ting Zhang,<sup>[b]</sup> Bo Zou,<sup>\*[b]</sup> Junrong Zheng,<sup>\*[a]</sup> Yuguo Ma<sup>\*[a]</sup>

---

<sup>a.</sup> *College of Chemistry and Molecular Engineering, Beijing National Laboratory for Molecular Sciences, Peking University, Beijing 100871, China*

<sup>b.</sup> *State Key Laboratory of Superhard Materials, College of Physics, Jilin University, Changchun 130012, China*

**Table of Contents**

|                                                              |     |
|--------------------------------------------------------------|-----|
| Table of Contents.....                                       | S2  |
| 1. Experimental Procedures .....                             | S3  |
| 1.1 Material and Methods.....                                | S3  |
| 1.2 Synthesis and Characterization .....                     | S3  |
| 2. Additional Experimental and Calculation Results.....      | S5  |
| 3. Crystal Structures.....                                   | S13 |
| 4. Discussion on the Stability of DPP-modified AIEgens ..... | S20 |
| 5. References.....                                           | S22 |
| 6. NMR Spectra of Synthesized Compounds .....                | S23 |

## 1. Experimental Procedures

### 1.1 Material and Methods

**Materials:** All the reactions sensitive to oxygen were performed under N<sub>2</sub> through standard Schlenk technique. All the reactions sensitive to moisture were performed using the drying tube equipped with CaCl<sub>2</sub>. All reagents were purchased from commercial suppliers and used directly unless otherwise specified. CH<sub>2</sub>Cl<sub>2</sub> (DCM) and Et<sub>3</sub>N were distilled under N<sub>2</sub> atmosphere with CaH<sub>2</sub>, and toluene were distilled under N<sub>2</sub> atmosphere with sodium. The crystallizations from dichloromethane and petroleum ether afford single crystals suitable for structure determination.

**Instruments:** NMR spectra were recorded on a Bruker Advance 400 MHz spectrometer, using CDCl<sub>3</sub>, DMSO-*d*<sub>6</sub> or D<sub>6</sub>-acetone as solvent. Chemical shifts are reported as part per million (ppm) relative to the internal referenced TMS. High resolution mass spectra (HR-MS) were recorded on a Bruker Apex IV FTMS mass spectrometers, using electrospray ionization (ESI) mode. UV-Vis absorption spectra were measured by using Hitachi U-4100 spectrophotometer. The photometer is equipped with a R928 photomultiplier tube (180-850 nm) and excitation light source is a 150 W xenon lamp where the excitation light path is perpendicular to the detection light path. Absolute photoluminescence quantum yield, transient fluorescence decay characteristics and temperature-dependent photoluminescence spectra were measured on Edinburgh Instrument FLS980 spectrometer equipped with an integrating sphere (N-M01), a picosecond pulsed diode laser (EPL-365) and a closed cycle cryostat respectively. XRD data were collected on powder X-ray diffractometer (X-Pert3 Powder) and single crystal X-ray diffractometer (XtaLAB PRO 007HF(Mo)) respectively. High pressure experiments were performed using symmetric diamond anvil cells (DACs) at room temperature. The culet diameter of the diamond anvils was 500 μm. The sample was placed in the holes (diameter: ca. 170 μm) of a T301 steel gasket, which was pre-indented to a thickness of 50 μm. The silicon oil was used as pressure transmitting medium (PTM) in high-pressure photoluminescence and UV-Vis absorption experiments. A small ruby chip was inserted into the sample compartment for in-situ pressure calibration according to the R1 ruby fluorescence method. The 405 nm line of a laser with a power of 100 mW was used for pressure calibration. The photoluminescence measurements under high pressure were performed on a QE65000 Scientific-grade spectrometer in the reflection mode. The 355 nm line of a laser with a power of 10 mW was used as the excitation source. The in-situ UV/Vis absorption measurements under high pressure were performed on an Ocean Optics QE65000 Scientific-grade spectrometer. In situ PL and absorption photographs were recorded by camera (Canon Eos 5D mark II) equipped on a microscope (Eclipse TI-U, Nikon). The ultrafast measurements were performed with laser pulses (1 kHz, ~50 fs pulse width, 800 nm central wavelength) from an amplified Ti:sapphire laser system (Uptek Solutions Inc.).

**Calculation methods:** To confirm the mechanism, calculations on the structures were carried out. The M06-2X<sup>[1]</sup> is used in combination with 6-31g\*\* basis set to compute the equilibrium structures and vibrational frequencies.<sup>[2]</sup> These calculations were performed with the Gaussian 09 software.<sup>[3]</sup> The SOC constant was computed by orca.<sup>[4]</sup>

### 1.2 Synthesis and Characterization

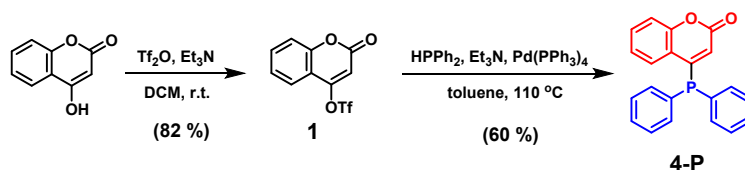

**Compound 1** was synthesized according to the literature procedure<sup>[5]</sup>. A dry round-bottom flask, equipped with a magnetic stirring bar and a septum, was charged with 1 g of 4-hydroxycoumarin (6.2 mmol, 1.0 equiv), NEt<sub>3</sub> (1.12 mL, 1.3 equiv) and CH<sub>2</sub>Cl<sub>2</sub> (25 mL). The mixture was cooled to 0 °C and trifluoromethanesulfonic anhydride (8 mmol, 1.3 equiv) was added dropwise. The reaction was then warm to room temperature and stirred for overnight. Then the solvents were evaporated under reduced pressure and the residue was subjected to column chromatography purification on silica, yielding the respective triflate **1** (1.5 g, 82%).

<sup>1</sup>H NMR (400 MHz, DMSO-*d*<sub>6</sub>) δ 7.82 (ddd, *J* = 8.7, 7.3, 1.6 Hz, 1H), 7.77-7.66 (m, 1H), 7.59 (dd, *J* = 8.4, 1.1 Hz, 1H), 7.56-7.51 (m, 1H), 6.91 (s, 1H).

**4-P:** A dry and nitrogen flushed Schlenk tube, equipped with a magnetic stirring bar, was charged with 200 mg **1** (0.7 mmol, 1 equiv) and 12 mg Pd(PPh<sub>3</sub>)<sub>4</sub> (0.01 mmol, 0.015 equiv), and dissolved in NEt<sub>3</sub> (0.28 mL, 3 equiv), HPPH<sub>2</sub> (0.13 mL, 1.1 equiv) and toluene (5 mL). The mixture was heated to 110 °C and stirred for overnight. The reaction progress was monitored by thin-layer chromatography (TLC). Upon completion the solvents were evaporated and the residue was subjected to column chromatography purification on silica yielding the respective product **4-P** (134 mg, 60%).

<sup>1</sup>H NMR (400 MHz, Chloroform-*d*) δ 7.72 (ddd, *J* = 8.0, 3.0, 1.6 Hz, 1H), 7.55-7.30 (m, 12H), 7.12 (ddd, *J* = 8.3, 7.3, 1.3 Hz, 1H), 5.92 (d, *J* = 3.5 Hz, 1H); <sup>13</sup>C NMR (100 MHz, CDCl<sub>3</sub>) δ 159.6, 159.6, 156.9, 156.6, 152.8, 152.8, 134.7, 134.5, 132.1, 132.0, 131.7, 130.2, 129.3, 129.2, 127.0, 126.8, 124.1, 124.1, 120.7, 120.7, 120.2, 120.0, 117.1, 117.1; <sup>31</sup>P NMR (200 MHz, CDCl<sub>3</sub>) δ -14.0; HR-MS (ESI): *m/z* cal for C<sub>21</sub>H<sub>16</sub>O<sub>2</sub>P [M+H]<sup>+</sup>: 331.0882; found: 331.0887.

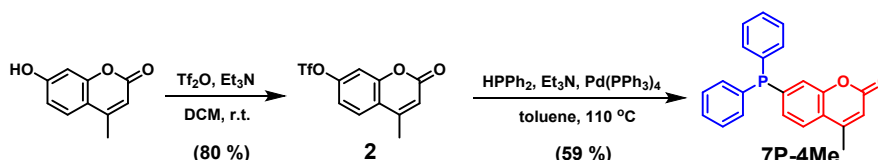

**Compound 2** was synthesized according to the literature procedure<sup>[5]</sup>. A dry round-bottom flask, equipped with a magnetic stirring bar and a septum, was charged with 1 g of 4-hydroxycoumarin (5.7 mmol, 1.0 equiv) dissolved in NEt<sub>3</sub> (1.02 mL, 1.3 equiv) and CH<sub>2</sub>Cl<sub>2</sub> (25 mL). The mixture was cooled to 0 °C and trifluoromethanesulfonic anhydride (7.4 mmol, 1.3 equiv) was added dropwise. The reaction was allowed to warm to room temperature and stirred for overnight. Then the solvents were evaporated and the residue was subjected to column chromatography purification on silica yielding the respective triflate **2** (1.4 g, 80%)

<sup>1</sup>H NMR (400 MHz, Chloroform-*d*) δ 7.71 (d, *J* = 8.7 Hz, 1H), 7.40-7.17 (m, 2H), 6.36 (d, *J* = 1.5 Hz, 1H), 2.47 (d, *J* = 1.3 Hz, 3H).

**7P-4Me**: Following a similar procedure for **4-P**, a dry and nitrogen flushed Schlenk tube, equipped with a magnetic stirring bar, was charged with 500 mg **2** (1.6 mmol, 1 equiv) and 28 mg Pd(PPh<sub>3</sub>)<sub>4</sub> (0.02 mmol, 0.015 equiv) dissolved in NEt<sub>3</sub> (0.68 mL, 3 equiv), HPPH<sub>2</sub> (0.28 mL, 1.1 equiv) and toluene (5 mL). The mixture was heated to 110 °C and stirred for overnight. The reaction progress was monitored by TLC (1:4 ethyl acetate (EA)/petroleum ether). Upon completion the solvents were evaporated and the residue was subjected to column chromatography purification on silica yielding the respective product **7P-4Me** (491 mg, 88%).

<sup>1</sup>H NMR (400 MHz, Chloroform-*d*) δ 7.54 (dd, *J* = 8.1, 1.7 Hz, 1H), 7.44-7.23 (m, 11H), 7.11 (dd, *J* = 6.0, 1.4 Hz, 1H), 6.28 (d, *J* = 1.4 Hz, 1H), 2.42 (d, *J* = 1.2 Hz, 3H); <sup>13</sup>C NMR (100 MHz, CDCl<sub>3</sub>) δ 160.5, 153.4, 153.3, 152.1, 143.9, 143.7, 135.7, 135.6, 134.1, 133.9, 129.4, 129.0, 128.9, 128.8, 124.3, 124.2, 121.3, 121.1, 119.8, 115.4, 18.6; <sup>31</sup>P NMR (200 MHz, CDCl<sub>3</sub>) δ -4.8; HR-MS (ESI): *m/z* cal for C<sub>22</sub>H<sub>18</sub>O<sub>2</sub>P [M+H]<sup>+</sup>: 345.1039; found: 345.1043.

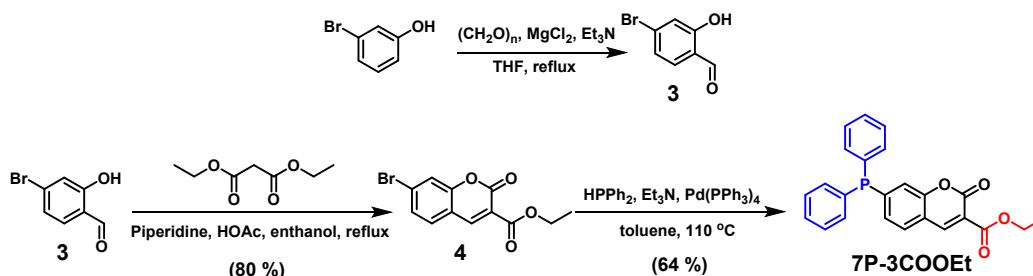

**Compound 3**: Following a modified procedure from literature<sup>[6]</sup>, to a dry round-bottom flask containing a solution of 10.6 mL Et<sub>3</sub>N (80 mmol, 4 equiv) and 4.2 g paraformaldehyde (138 mmol, 7 equiv) in THF (100 mL) was added 3.46 g 3-bromophenol (20 mmol, 1 equiv) and 2.86 g MgCl<sub>2</sub> (30 mmol, 1.5 equiv). The mixture was stirred intensely below 45 °C, then was heated to reflux at 80 °C for overnight. The reaction was deemed completed by TLC (1:2 DCM/petroleum ether) with complete consumption of starting material. The reaction mixture was cooled to room temperature, adjusted to pH 1 with 1 M aqueous HCl, and then extracted with EA. The combined organic layers were washed with water, brine, dried over anhydrous Na<sub>2</sub>SO<sub>4</sub>, filtered and concentrated under vacuum to give crude 4-bromo-2-hydroxybenzaldehyde **3** (4 g, 99%) as yellow oil. This compound was used directly without further purification.

<sup>1</sup>H NMR (400 MHz, Chloroform-*d*) δ 11.12 (d, *J* = 1.3 Hz, 1H), 9.89-9.78 (m, 1H), 7.41 (dd, *J* = 8.2, 1.9 Hz, 1H), 7.23-7.13 (m, 2H).

**Compound 4**: Following a modified procedure from literature<sup>[7]</sup>, a dry round-bottom flask equipped with a magnetic stirring bar, was charged with 2 g of compound **3** (10 mmol, 1 equiv), 3.2 g diethylmalonate (20 mmol, 2 equiv), 80 mg piperidine (0.1 mmol, 0.1 equiv) and 60 mg HOAc (0.1 mmol, 0.1 equiv) in 50 mL ethanol. The mixture was heated to reflux for 4 h. The reaction was deemed completed by TLC (1:5 EA/petroleum ether) with complete consumption of starting material. The reaction mixture was cooled to room temperature. The portion of solvents were evaporated and water was added to the mixture to obtain product as a crystalline solid (2.4 g, 80%).

<sup>1</sup>H NMR (400 MHz, Chloroform-*d*) δ 8.49 (d, *J* = 0.7 Hz, 1H), 7.55 (d, *J* = 1.0 Hz, 1H), 7.47 (d, *J* = 1.1 Hz, 2H), 4.42 (q, *J* = 7.1 Hz, 2H), 1.41 (t, *J* = 7.1 Hz, 3H).

**7P-3COOEt**: Following a similar procedure for **4-P**, a dry and nitrogen flushed Schlenk tube equipped with a magnetic stirring bar was charged with 500 mg **4** (1.7 mmol, 1 equiv) and 29 mg Pd(PPh<sub>3</sub>)<sub>4</sub> (0.03 mmol, 0.015 equiv), dissolved in NEt<sub>3</sub> (0.7 mL, 3 equiv), HPPH<sub>2</sub> (0.29 mL, 1.1 equiv) and toluene (5 mL). The mixture was heated to 110 °C and stirred for overnight. The reaction progress was monitored by TLC (1:2 EA/petroleum ether). Then the solvents were evaporated and the residue was subjected to column chromatography purification on silica yielding the respective product **7P-3COOEt** (420 mg, 64%).

<sup>1</sup>H NMR (400 MHz, Chloroform-*d*) δ 8.50 (s, 1H), 7.53 (dd, *J* = 7.9, 1.8 Hz, 1H), 7.45-7.27 (m, 11H), 7.10-7.06 (m, 1H), 4.41 (q, *J* = 7.1 Hz, 2H), 1.40 (t, *J* = 7.1 Hz, 3H); <sup>13</sup>C NMR (100 MHz, CDCl<sub>3</sub>) δ 163.0, 156.6, 154.9, 154.8, 148.3, 148.2, 148.0, 135.0, 134.9, 134.3, 134.1, 129.7, 129.3, 129.04, 129.00, 128.9, 128.85, 128.77, 120.5, 120.4, 118.2, 117.5, 62.0, 14.3; <sup>31</sup>P NMR (200 MHz, CDCl<sub>3</sub>) δ -3.0; HR-MS (ESI): *m/z* cal for C<sub>24</sub>H<sub>20</sub>O<sub>4</sub>P [M+H]<sup>+</sup>: 403.1094; found: 403.1096.

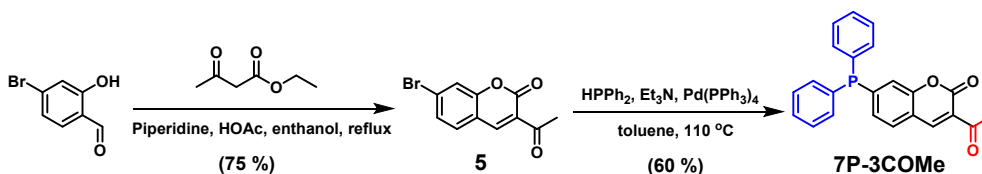

**Compound 5:** Following a modified procedure for compound **4**, a dry round-bottom flask equipped with a magnetic stirring bar was charged with 0.2 g compound **3** (1 mmol, 1 equiv), 0.26 g diethylmalonate (2 mmol, 2 equiv), 0.8 mg piperidine (0.01 mmol, 0.1 equiv) in 10 mL ethanol. The mixture was heated to reflux for 4 h. The reaction mixture was deemed complete by TLC (1:5 EA/petroleum ether) with complete consumption of starting material. The reaction mixture was cooled to room temperature to obtain product as a crystalline solid (200 mg, 75%).

$^1\text{H NMR}$  (400 MHz, Chloroform-*d*)  $\delta$  8.47 (s, 1H), 7.57 (d,  $J$  = 1.6 Hz, 1H), 7.54-7.40 (m, 2H), 2.72 (s, 3H).

**7P-3COMe:** Following a similar procedure for **4-P**, a dry and nitrogen flushed Schlenk tube equipped with a magnetic stirring bar was charged with 100 mg **5** (0.37 mmol, 1 equiv) and 7 mg  $\text{Pd}(\text{PPh}_3)_4$  (0.006 mmol, 0.015 equiv), dissolved in  $\text{NEt}_3$  (0.14 mL, 3 equiv),  $\text{HPPH}_2$  (0.06 mL, 1.1 equiv) and toluene (2 mL). The mixture was heated to 110 °C and stirred for overnight. The reaction progress was monitored by TLC (1:2 EA/petroleum ether). Then the solvents were evaporated and the residue was subjected to column chromatography purification on silica to yield the respective product **7P-3COMe** (83 mg, 60%).

$^1\text{H NMR}$  (400 MHz, Chloroform-*d*)  $\delta$  8.48 (s, 1H), 7.57 (d,  $J$  = 7.9, 1H), 7.45-7.28 (m, 11H), 7.11 (d,  $J$  = 7.9, 1H), 2.71 (s, 3H);  $^{13}\text{C NMR}$  (100 MHz,  $\text{CDCl}_3$ )  $\delta$  195.3, 159.1, 155.0, 154.9, 148.4, 148.2, 147.1, 135.0, 134.9, 134.3, 134.1, 129.7, 129.6, 129.5, 129.4, 129.2, 129.0, 128.9, 124.4, 120.4, 120.2, 117.8, 30.6;  $^{31}\text{P NMR}$  (200 MHz,  $\text{CDCl}_3$ )  $\delta$  -2.8; HR-MS (ESI):  $m/z$  cal for  $\text{C}_{23}\text{H}_{18}\text{O}_3\text{P}$   $[\text{M}+\text{H}]^+$ : 373.0988; found: 373.0982.

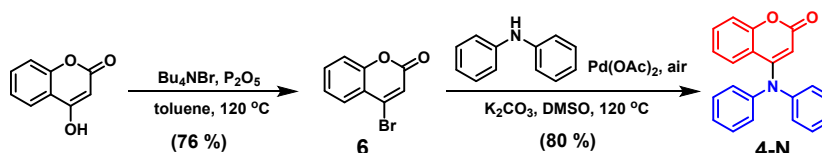

**Compound 6:** Following a similar procedure from literature<sup>[8]</sup>, a solution of 4-hydroxy coumarin (1 g, 6.2 mmol) in toluene (40 mL) was heated to 120 °C for 10 min and then  $\text{Bu}_4\text{NBr}$  (6 g, 18.6 mmol) was added in portion-wise over 5 min, and the reaction mixture was stirred for another 10 min to dissolve the starting material completely.  $\text{P}_2\text{O}_5$  (3.2 g, 14.9 mmol) was then added in portions over 10 min and the reaction was heated for 5 h until reaction completion by TLC monitoring (1:2 EA/petroleum ether). Then the reaction mixture was cooled to room temperature and washed with a saturated aqueous  $\text{NaHCO}_3$  solution. The reaction mixture was extracted with EA, dried over anhydrous  $\text{Na}_2\text{SO}_4$ , filtered and concentrated under reduced pressure. The residue was purified by column chromatography using ethyl acetate-petroleum ether to give the desired product **7** (1.05 g, 76%).

$^1\text{H NMR}$  (400 MHz, Chloroform-*d*)  $\delta$  7.86 (dd,  $J$  = 7.9, 1.6 Hz, 1H), 7.61 (ddd,  $J$  = 8.2, 7.4, 1.6 Hz, 1H), 7.45-7.32 (m, 2H), 6.88 (s, 1H).

**4-N:** Following a similar procedure from literature<sup>[9]</sup>, a dry round-bottom flask equipped with a magnetic stirring bar was charged with diphenylamine (320 mg, 1.9 mmol), compound **7** (500 mg, 2.8 mmol),  $\text{Pd}(\text{OAc})_2$  (19 mg, 0.08 mmol) and  $\text{K}_2\text{CO}_3$  (1 g, 2.8 mmol) in DMSO (10 mL). The reaction mixture was heated to 120 °C and stirred for overnight. After completion of the reaction by TLC monitoring (1:2 EA/petroleum ether), the reaction mixture was cooled to room temperature and added with a saturated  $\text{NH}_4\text{Cl}$  solution. Then the mixture was extracted with EA. The organic layer was dried over anhydrous  $\text{Na}_2\text{SO}_4$ , filtered and concentrated under reduced pressure. The residue was purified by column chromatography using ethyl acetate-petroleum ether to give the product **4-N**. (470 mg, 80%)

$^1\text{H NMR}$  (400 MHz, Chloroform-*d*)  $\delta$  7.42 (ddd,  $J$  = 8.6, 7.1, 1.6 Hz, 1H), 7.37-7.30 (m, 4H), 7.24-7.17 (m, 3H), 7.11-7.06 (m, 3H), 6.96 (ddd,  $J$  = 8.3, 7.2, 1.4 Hz, 1H), 5.78 (s, 1H);  $^{13}\text{C NMR}$  (101 MHz,  $\text{CDCl}_3$ )  $\delta$  162.38, 157.65, 154.56, 146.54, 131.40, 129.79, 126.51, 125.84, 125.70, 123.17, 117.52, 116.84, 105.08; HR-MS (ESI):  $m/z$  cal for  $\text{C}_{21}\text{H}_{16}\text{NO}_2$   $[\text{M}+\text{H}]^+$ : 314.1176; found: 314.1176.

## 2. Additional Experimental and Calculation Results

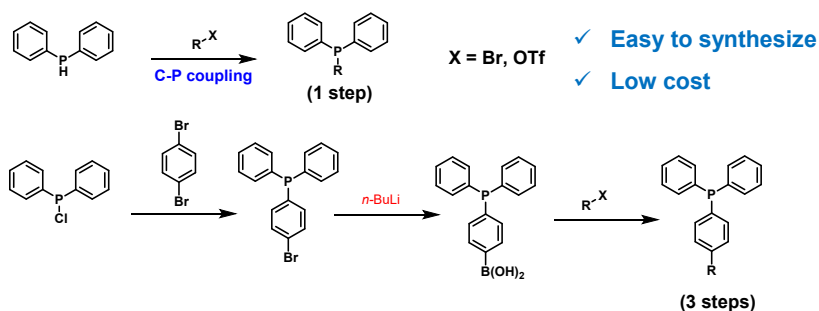

**Figure S1.** Comparison of the synthetic routes based on DPP modification and TPP modification. From the perspective of synthesis, DPP modification is more economical and the reaction conditions are moderate.

**Table S1.** Summary of the photophysical properties of DPP-modification molecules.

| PLQY                | 4-P    | 7P-4Me | 7P-3COMe | 7P-3COOEt |
|---------------------|--------|--------|----------|-----------|
| THF (%)             | < 0.01 | < 0.01 | < 0.01   | 0.2       |
| Solid (%)           | 10.3   | 47.0   | 19.0     | 38.4      |
| $\lambda_{em}$ (nm) | 560    | 460    | 554      | 603       |

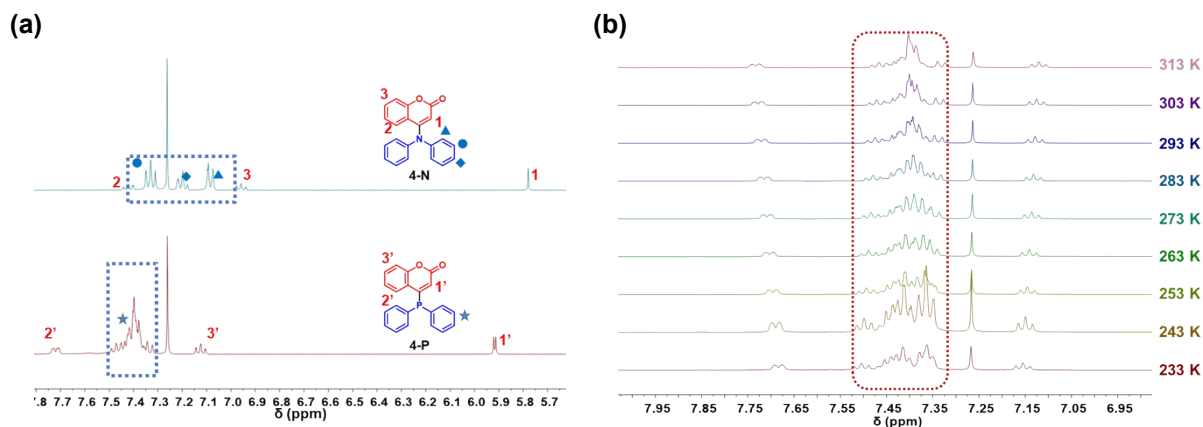

**Figure S2.** a) Comparison of  $^1\text{H}$  NMR spectra of **4-N** and **4-P** in  $\text{CDCl}_3$  at 298 K; b)  $^1\text{H}$  NMR spectra of **4-P** in  $\text{CDCl}_3$  at different temperatures.

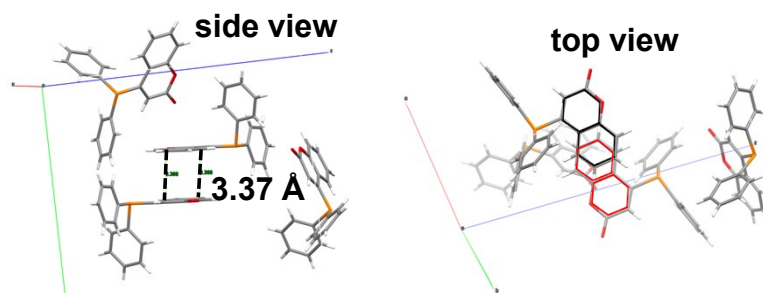

**Figure S3.** XRD structure analysis of **4-P** with the labelled distance between adjacent molecule layer and overlap of conjugated area.

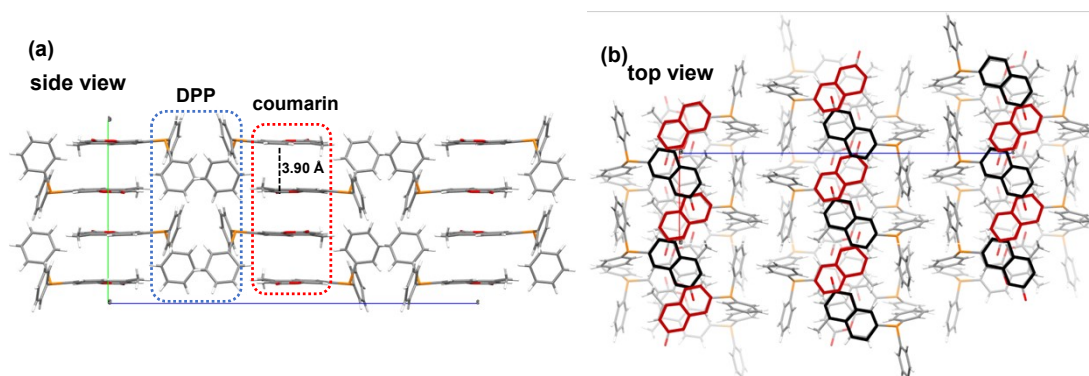

**Figure S4.** XRD structure analysis of **7P-4Me** with the labelled distance between adjacent molecule layer and overlap of conjugated area.

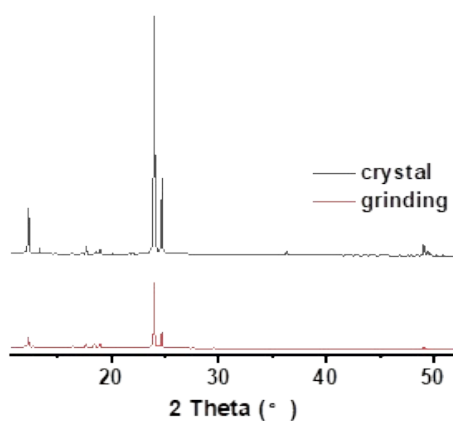

**Figure S5.** Powder XRD results of **7P-4Me** before and after grinding. The diffraction signals become weaker or even disappear after grinding indicating the amorphization process upon grinding.

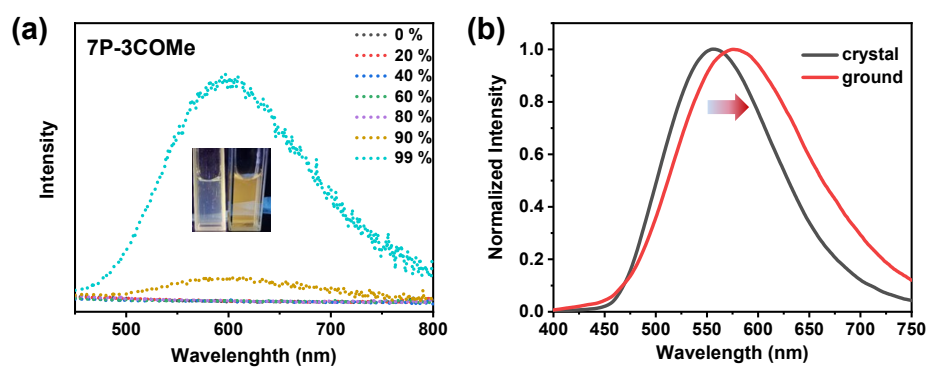

**Figure S6.** The emission spectra of **7P-COMe** in a) THF/H<sub>2</sub>O mixture with different water ratios. b) crystal state before and after grinding.

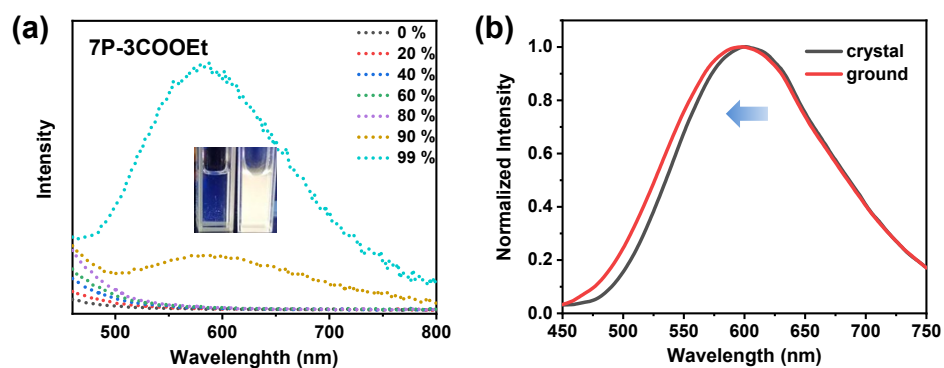

**Figure S7.** The emission spectra of **7P-COEt** in a) THF/H<sub>2</sub>O mixture with different water ratios. b) crystal state before and after grinding.

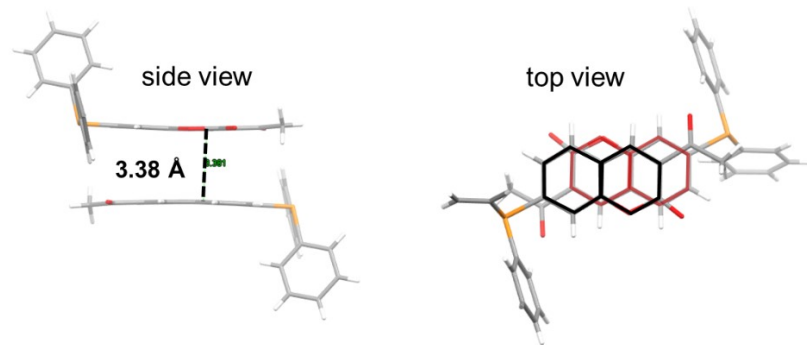

**Figure S8.** XRD structure analysis of **7P-COMe** with the labelled distance between adjacent molecule layer and overlap of conjugated area.

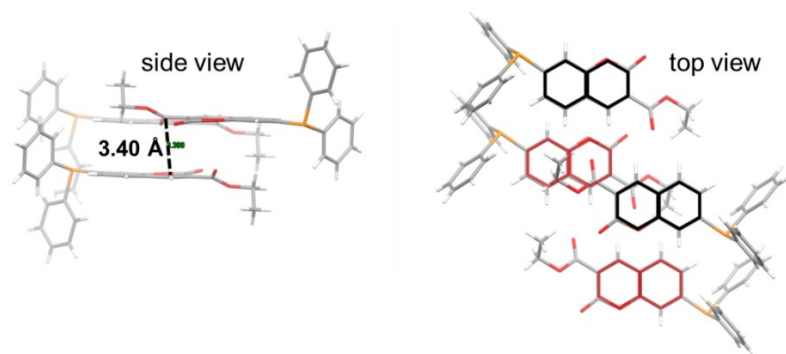

**Figure S9.** XRD structure analysis of **7P-COOEt** with the labelled distance between adjacent molecule layer and overlap of conjugated area.

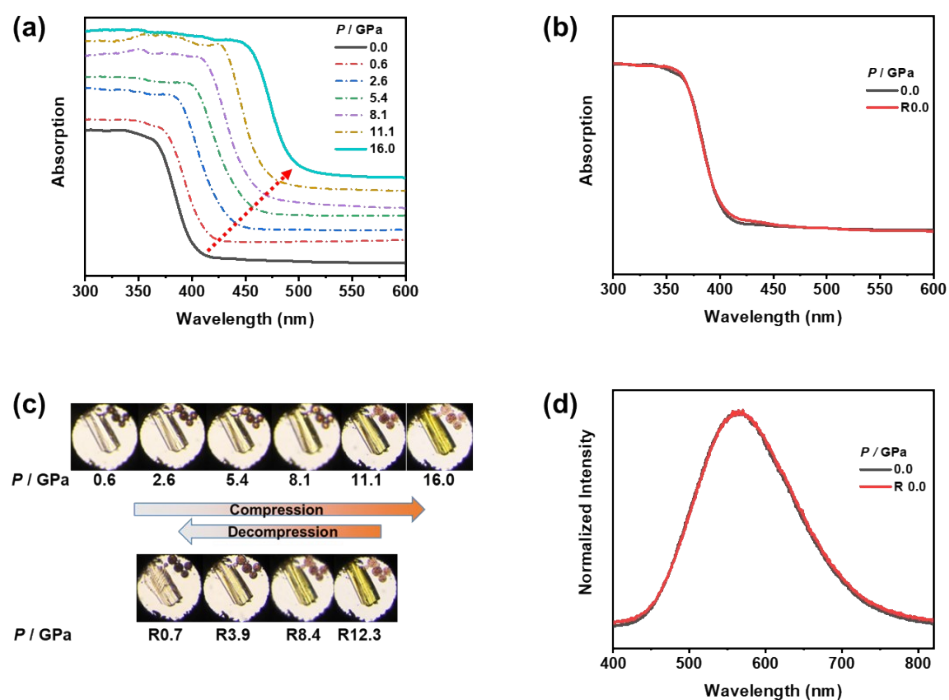

**Figure S10.** UV-visible absorption spectra of **4-P** crystal a) under high pressure; b) at the pressure of 0.0 GPa and released pressure of 0.0 GPa. c) Corresponding optical photographs at different pressures show the evolution of the sample's color with increasing pressure. d) PL spectra of **4-P** at the pressure of 0.0 GPa and released pressure of 0.0 GPa excited by a 355 nm laser.



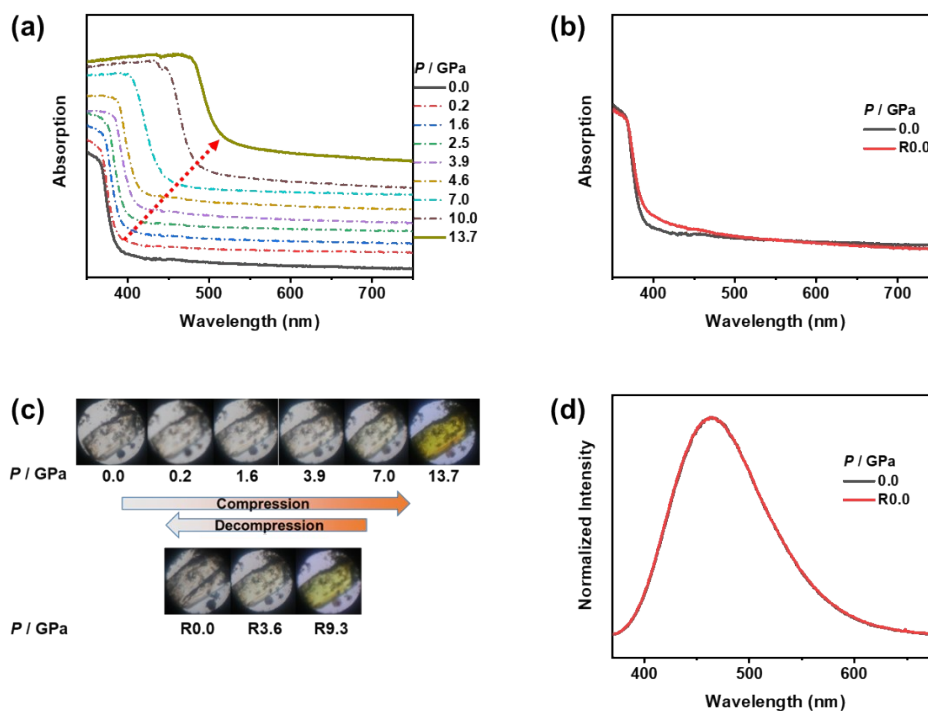

**Figure S11.** UV-visible absorption spectra of **7P-4Me** crystal a) under high pressure; b) at the pressure of 0.0 GPa and released pressure of 0.0 GPa. c) Corresponding optical photographs at different pressures show the evolution of the sample's color with increasing pressure. d) PL spectra of **7P-4Me** at the pressure of 0.0 GPa and released pressure of 0.0 GPa excited by a 355 nm laser.

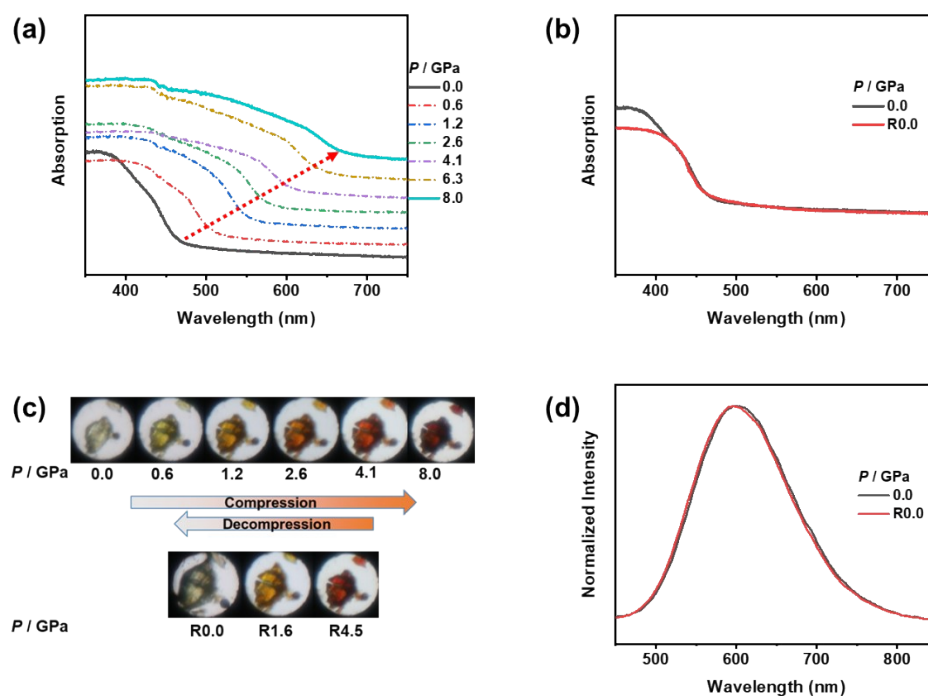

**Figure S12.** UV-visible absorption spectra of **7P-3COOEt** crystal a) under high pressure; b) at the pressure of 0.0 GPa and released pressure of 0.0 GPa. c) Corresponding optical photographs at different pressures show the evolution of the sample's color with increasing pressure. d) PL spectra of **7P-3COOEt** at the pressure of 0.0 GPa and released pressure of 0.0 GPa excited by a 355 nm laser.

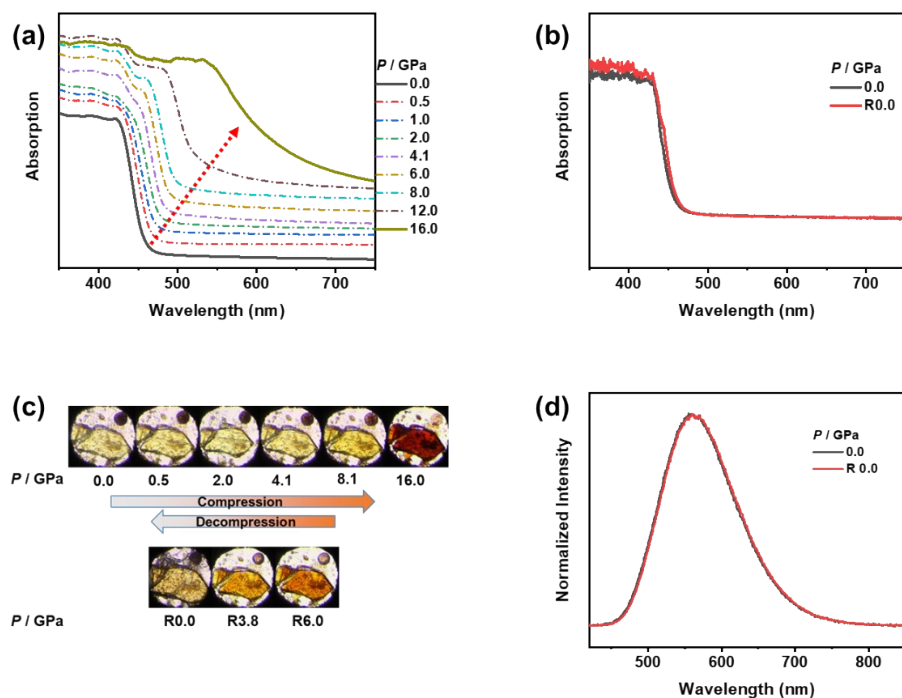

**Figure S13.** UV-visible absorption spectra of **7P-3COMe** crystal a) under high pressure; b) at the pressure of 0.0 GPa and released pressure of 0.0 GPa. c) Corresponding optical photographs at different pressures show the evolution of the sample's color with increasing pressure. d) PL spectra of **7P-3COMe** at the pressure of 0.0 GPa and released pressure of 0.0 GPa excited by a 355 nm laser.

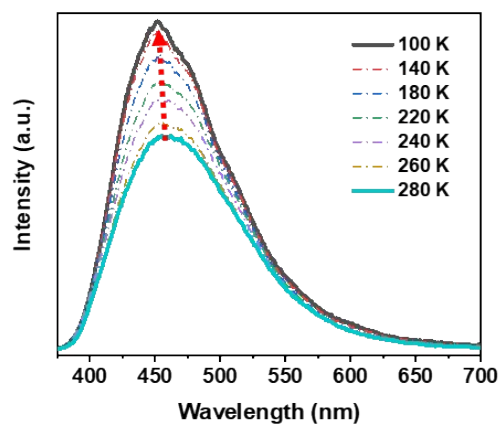

**Figure S14.** Temperature dependent photoluminescence spectra of **7P-4Me** in crystal state.

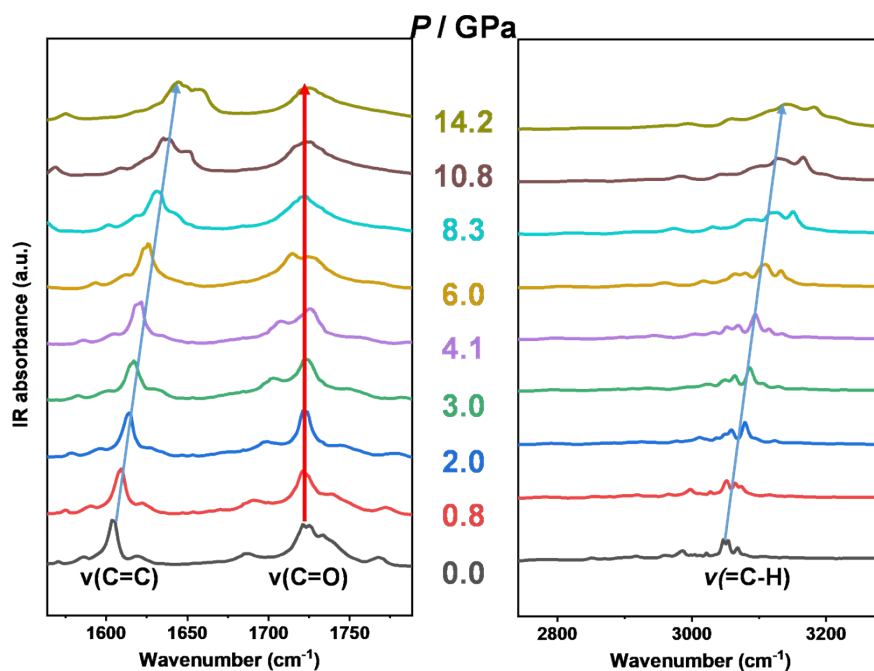

**Figure S15.** IR spectra of 7P-4Me at different pressure until 14.2 GPa at room temperature in the region of  $\nu(\text{C}=\text{C})$ ,  $\nu(\text{C}=\text{O})$  and  $\nu(=\text{C}-\text{H})$  vibrational modes. The stretching vibration frequency of carbonyl group  $\nu(\text{C}=\text{O})$  is almost unchanged upon compression indicating that C=O bonds are not shortened with increasing pressure as observed from other bonds. This phenomena demonstrates that the C=O $\cdots$ H interactions get stronger with increasing pressure. The increased strength of intermolecular H-bonding hinders the intramolecular motion, therefore inhibiting the nonradiative process.

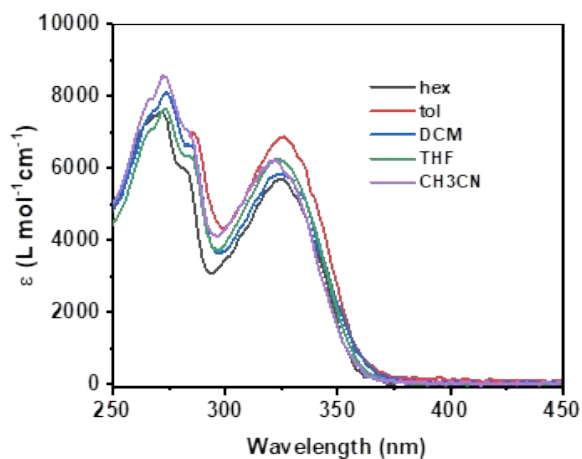

**Figure S16.** UV-vis spectra of 7P-4Me in different solvents at 298 K. The absorption peaks are almost unchanged in different solvents, which indicates that it is a localized absorption.

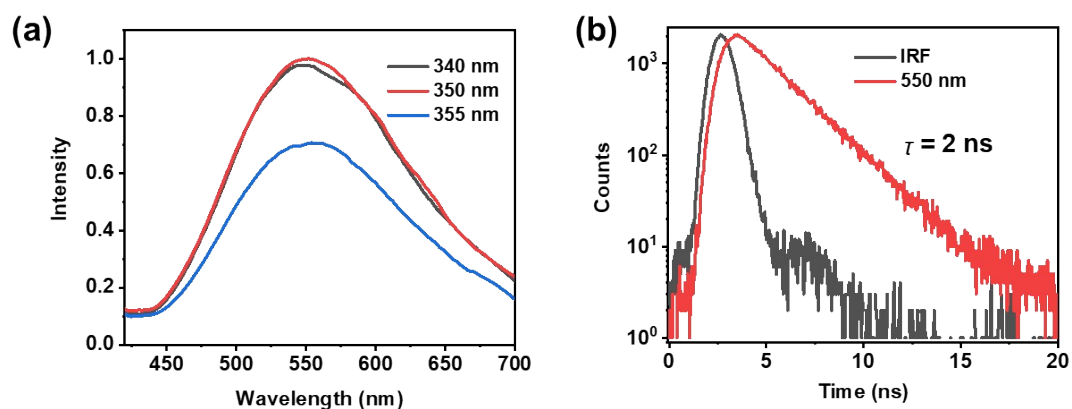

**Figure S17.** Emission spectra of **7P-4Me** at viable excitation wavelength and transient fluorescence decay at 550 nm in cyclohexane. The emission peak does not change under different excitation wavelength. And the emission lifetime is about 2 ns. Which means that the fluorescence emission obeys Kasha's rule.

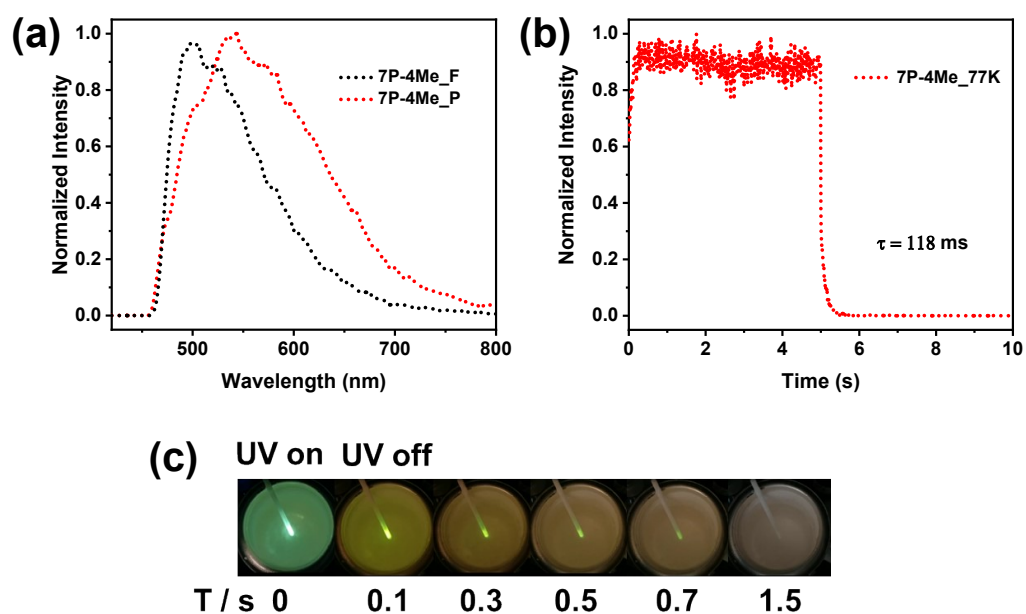

**Figure S18.** a) Fluorescence spectrum and phosphorescence spectrum of **7P-4Me** and b) transient phosphorescence decay curve at 550 nm in DCM under 77 K. c) Afterglow images of **7P-4Me** in DCM after 365 nm excitation at 77K.

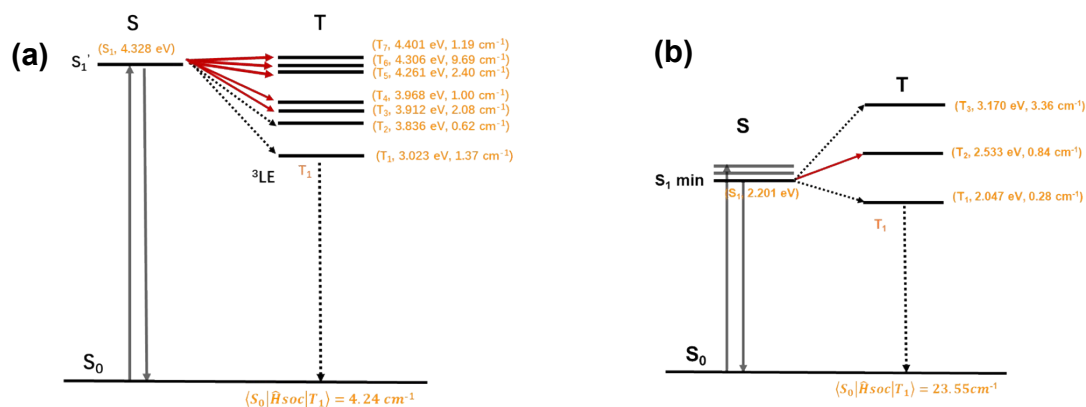

**Figure S19.** a) Calculated energy levels and spin-orbit coupling constants between  $S_1$  and  $T_n$  based on the corresponding molecular geometries of  $S_{0, min}$  and  $S_{1, min}$ .

### 3. Crystal Structures

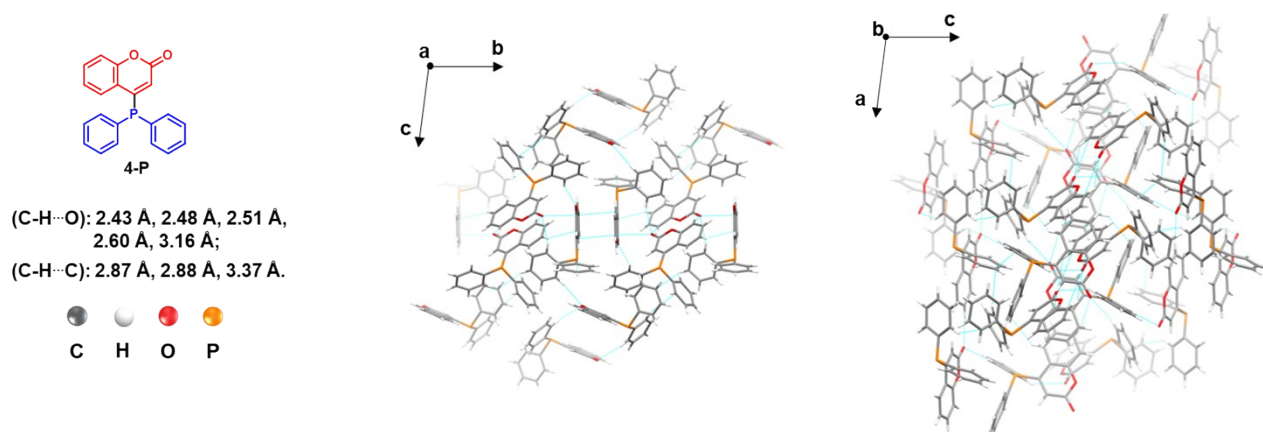

**Figure S20.** Crystal structure of **4-P** including the major intermolecular interactions. Color codes: C (gray), H (white), O (red), P (yellow).

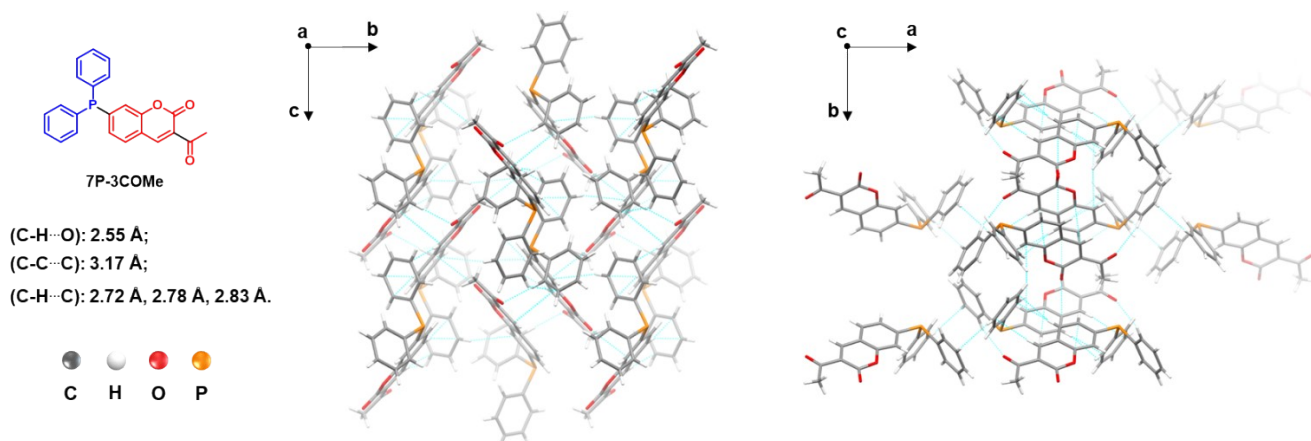

**Figure S21.** Crystal structure of **7P-3COMe** including the major intermolecular interactions. Color codes: C (gray), H (white), O (red), P (yellow).

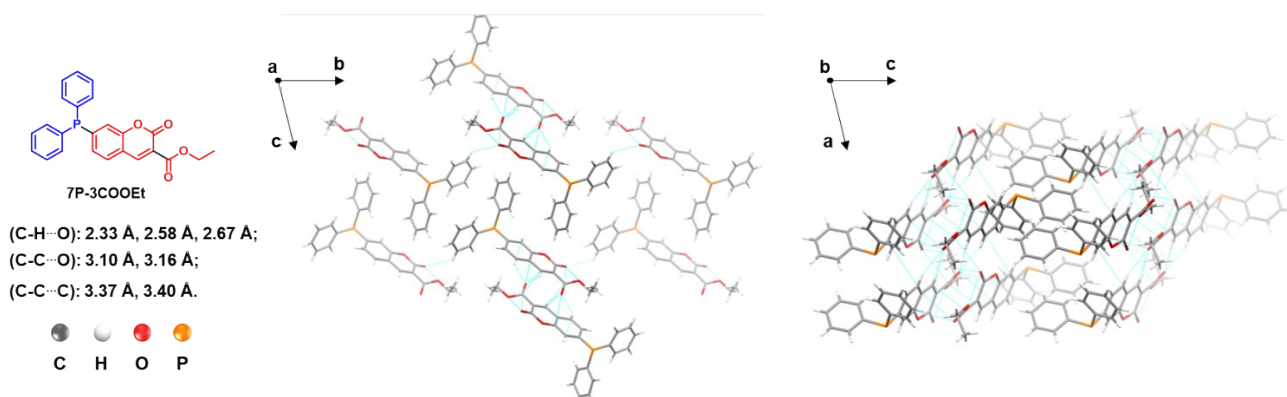

**Figure S22.** Crystal structure of **7P-3COOEt** including the major intermolecular interactions. Color codes: C (gray), H (white), O (red), P (yellow).

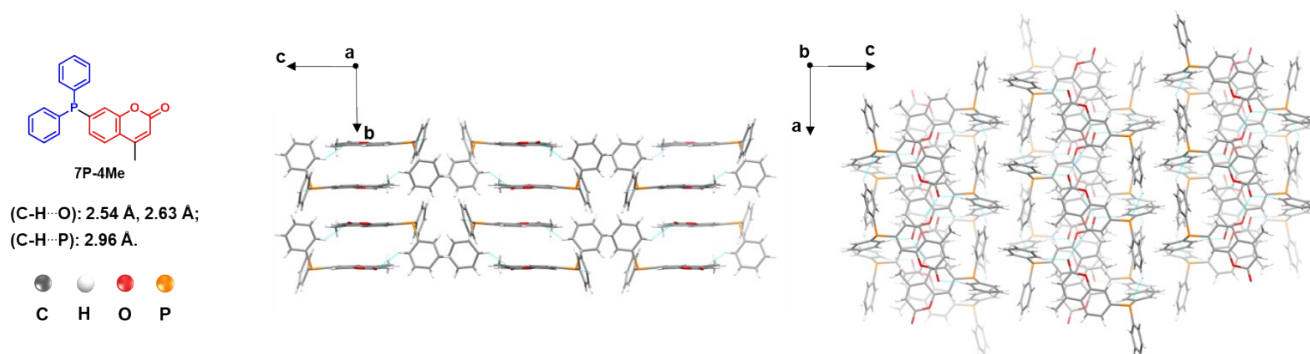

**Figure S23.** Crystal structure of **7P-4Me** including the major intermolecular interactions. Color codes: C (gray), H (white), O (red), P (yellow).

**Table S2.** Summary of the crystal structure information of DPP-modification molecules.

| Identification code                         | 4-P                                                            | 7P-3COMe                                                      | 7P-3COOEt                                                     | 7P-4Me                                                        |
|---------------------------------------------|----------------------------------------------------------------|---------------------------------------------------------------|---------------------------------------------------------------|---------------------------------------------------------------|
| CCDC number                                 | 2119796                                                        | 2119797                                                       | 2119798                                                       | 2119799                                                       |
| Empirical formula                           | C <sub>21</sub> H <sub>15</sub> O <sub>2</sub> P               | C <sub>23</sub> H <sub>17</sub> O <sub>3</sub> P              | C <sub>22</sub> H <sub>17</sub> O <sub>2</sub> P              | C <sub>22</sub> H <sub>17</sub> O <sub>2</sub> P              |
| Formula weight                              | 330.30                                                         | 372.33                                                        | 344.32                                                        | 344.32                                                        |
| Temperature/K                               | 179.99(10)                                                     | 100.00(14)                                                    | 100.00(11)                                                    | 100.00(11)                                                    |
| Crystal system                              | triclinic                                                      | monoclinic                                                    | orthorhombic                                                  | orthorhombic                                                  |
| Space group                                 | P-1                                                            | P <sub>2</sub> /c                                             | Pbcn                                                          | Pbcn                                                          |
| a/Å                                         | 9.0126(2)                                                      | 13.4282(9)                                                    | 8.0623(2)                                                     | 8.0623(2)                                                     |
| b/Å                                         | 14.6954(3)                                                     | 13.8412(7)                                                    | 14.6716(6)                                                    | 14.6716(6)                                                    |
| c/Å                                         | 19.5545(5)                                                     | 9.7598(5)                                                     | 29.7285(10)                                                   | 29.7285(10)                                                   |
| α/°                                         | 91.632(2)                                                      | 90                                                            | 90                                                            | 90                                                            |
| β/°                                         | 97.805(2)                                                      | 92.854(5)                                                     | 90                                                            | 90                                                            |
| γ/°                                         | 105.419(2)                                                     | 90                                                            | 90                                                            | 90                                                            |
| Volume/Å <sup>3</sup>                       | 2467.86(10)                                                    | 1811.73(18)                                                   | 3516.5(2)                                                     | 3516.5(2)                                                     |
| Z                                           | 6                                                              | 4                                                             | 8                                                             | 8                                                             |
| ρ <sub>calc</sub> /g/cm <sup>3</sup>        | 1.333                                                          | 1.365                                                         | 1.301                                                         | 1.301                                                         |
| μ/mm <sup>-1</sup>                          | 0.176                                                          | 0.173                                                         | 0.168                                                         | 0.168                                                         |
| F(000)                                      | 1032.0                                                         | 776.0                                                         | 1440.0                                                        | 1440.0                                                        |
| Crystal size/mm <sup>3</sup>                | 0.42 × 0.03 × 0.02                                             | 0.2 × 0.1 × 0.03                                              | 0.2 × 0.02 × 0.01                                             | 0.2 × 0.02 × 0.01                                             |
| Radiation                                   | Mo Kα (λ = 0.71073)                                            | Mo Kα (λ = 0.71073)                                           | MoKα (λ = 0.71073)                                            | MoKα (λ = 0.71073)                                            |
| 2θ range for data collection/°              | 4.742 to 58.942                                                | 5.112 to 62.632                                               | 5.482 to 62.436                                               | 5.482 to 62.436                                               |
| Index ranges                                | -10 ≤ h ≤ 12, -19 ≤ k ≤ 20, -26 ≤ l ≤ 26                       | -17 ≤ h ≤ 18, -12 ≤ k ≤ 19, -12 ≤ l ≤ 12                      | -8 ≤ h ≤ 10, -19 ≤ k ≤ 17, -41 ≤ l ≤ 30                       | -8 ≤ h ≤ 10, -19 ≤ k ≤ 17, -41 ≤ l ≤ 30                       |
| Reflections collected                       | 34864                                                          | 15183                                                         | 16318                                                         | 16318                                                         |
| Independent reflections                     | 12366 [R <sub>int</sub> = 0.0314, R <sub>sigma</sub> = 0.0464] | 4754 [R <sub>int</sub> = 0.0496, R <sub>sigma</sub> = 0.0609] | 4601 [R <sub>int</sub> = 0.0463, R <sub>sigma</sub> = 0.0533] | 4601 [R <sub>int</sub> = 0.0463, R <sub>sigma</sub> = 0.0533] |
| Data/restraints/parameters                  | 12366/0/649                                                    | 4754/0/245                                                    | 4601/0/227                                                    | 4601/0/227                                                    |
| Goodness-of-fit on F <sup>2</sup>           | 1.016                                                          | 1.066                                                         | 1.019                                                         | 1.019                                                         |
| Final R indexes [I > 2σ(I)]                 | R <sub>1</sub> = 0.0446, wR <sub>2</sub> = 0.0986              | R <sub>1</sub> = 0.0719, wR <sub>2</sub> = 0.1649             | R <sub>1</sub> = 0.0467, wR <sub>2</sub> = 0.1073             | R <sub>1</sub> = 0.0467, wR <sub>2</sub> = 0.1073             |
| Final R indexes [all data]                  | R <sub>1</sub> = 0.0727, wR <sub>2</sub> = 0.1078              | R <sub>1</sub> = 0.1014, wR <sub>2</sub> = 0.1793             | R <sub>1</sub> = 0.0793, wR <sub>2</sub> = 0.1206             | R <sub>1</sub> = 0.0793, wR <sub>2</sub> = 0.1206             |
| Largest diff. peak/hole / e Å <sup>-3</sup> | 0.28/-0.36                                                     | 0.85/-0.64                                                    | 0.60/-0.27                                                    | 0.60/-0.27                                                    |

**Table S3.** Fractional Atomic Coordinates (×10<sup>4</sup>) and Equivalent Isotropic Displacement Parameters (Å<sup>2</sup>×10<sup>3</sup>) for **4-P**. U<sub>eq</sub> is defined as 1/3 of the trace of the orthogonalised U<sub>ij</sub> tensor.

| Atom | x          | y          | z          | U(eq)     |
|------|------------|------------|------------|-----------|
| P1   | 2955.8(5)  | 7434.9(3)  | 9715.0(2)  | 32.79(11) |
| O1   | 4054.4(15) | 4409.1(9)  | 8742.0(7)  | 45.3(3)   |
| O2   | 1593.0(14) | 4341.2(8)  | 8772.7(6)  | 36.8(3)   |
| C1   | 5072(2)    | 7823.2(11) | 9783.7(8)  | 32.1(4)   |
| C2   | 5870(2)    | 8497.4(14) | 9385.5(10) | 44.2(5)   |

|     |             |             |             |           |
|-----|-------------|-------------|-------------|-----------|
| C3  | 7478(2)     | 8811.3(16)  | 9507.9(11)  | 57.3(6)   |
| C4  | 8314(2)     | 8452.7(16)  | 10020.8(11) | 53.9(5)   |
| C5  | 7545(2)     | 7776.5(15)  | 10419.4(11) | 50.8(5)   |
| C6  | 5942(2)     | 7475.7(13)  | 10311.7(9)  | 42.3(4)   |
| C7  | 2253(2)     | 8045.4(12)  | 8988.1(10)  | 40.2(4)   |
| C8  | 1977(3)     | 8914.2(14)  | 9141.7(14)  | 59.8(6)   |
| C9  | 1362(3)     | 9386.1(19)  | 8623(2)     | 84.4(10)  |
| C10 | 1006(3)     | 9005(2)     | 7959(2)     | 86.4(11)  |
| C11 | 1280(3)     | 8157(2)     | 7791.7(14)  | 70.9(8)   |
| C12 | 1919(2)     | 7679.2(16)  | 8307.7(11)  | 51.0(5)   |
| C13 | 2460.1(18)  | 6225.2(11)  | 9322.0(8)   | 26.5(3)   |
| C14 | 3535(2)     | 5801.0(11)  | 9158.7(8)   | 30.8(4)   |
| C15 | 3135(2)     | 4828.0(12)  | 8885.7(9)   | 32.9(4)   |
| C16 | 459.5(19)   | 4749.6(12)  | 8932.8(8)   | 31.8(4)   |
| C17 | 836.7(19)   | 5678.2(11)  | 9217.6(8)   | 28.5(3)   |
| C18 | -392(2)     | 6019.0(13)  | 9381.7(9)   | 36.5(4)   |
| C19 | -1904(2)    | 5456.3(15)  | 9258.6(9)   | 44.3(5)   |
| C20 | -2234(2)    | 4541.7(16)  | 8959.8(10)  | 46.2(5)   |
| C21 | -1055(2)    | 4183.9(14)  | 8798.4(9)   | 41.5(4)   |
| P2  | 1618.5(5)   | 3883.4(3)   | 6577.5(2)   | 26.74(10) |
| O3  | -1493.2(14) | 3589.5(10)  | 4109.8(6)   | 47.2(3)   |
| O4  | 974.5(12)   | 3625.9(8)   | 4173.1(5)   | 30.6(2)   |
| C22 | -310.5(19)  | 3845.2(11)  | 6785.6(8)   | 29.0(3)   |
| C23 | -605(2)     | 4716.2(13)  | 6908.8(9)   | 38.4(4)   |
| C24 | -2007(2)    | 4761.9(15)  | 7095.0(9)   | 47.8(5)   |
| C25 | -3130(2)    | 3941.6(16)  | 7170.1(9)   | 46.2(5)   |
| C26 | -2860(2)    | 3074.3(15)  | 7050.9(9)   | 45.2(5)   |
| C27 | -1461(2)    | 3023.7(13)  | 6853.7(9)   | 37.8(4)   |
| C28 | 1854.2(18)  | 2710.6(11)  | 6760.5(8)   | 26.2(3)   |
| C29 | 2651(2)     | 2621.8(12)  | 7409.2(8)   | 33.3(4)   |
| C30 | 2958(2)     | 1771.6(14)  | 7569.0(9)   | 41.9(4)   |
| C31 | 2487(2)     | 1009.3(13)  | 7088.4(10)  | 40.0(4)   |
| C32 | 1682(2)     | 1081.9(12)  | 6449.5(9)   | 37.4(4)   |
| C33 | 1361(2)     | 1927.7(11)  | 6285.9(9)   | 32.3(4)   |
| C34 | 1302.4(18)  | 3766.6(10)  | 5625.2(8)   | 24.7(3)   |
| C35 | -70.5(18)   | 3718.6(11)  | 5234.5(8)   | 30.8(4)   |
| C36 | -286.7(19)  | 3643.2(12)  | 4485.6(9)   | 32.7(4)   |
| C37 | 2405.4(18)  | 3692.1(10)  | 4556.1(8)   | 25.4(3)   |
| C38 | 2634.1(17)  | 3775.1(10)  | 5276.1(8)   | 23.9(3)   |
| C39 | 4137.3(18)  | 3863.4(11)  | 5618.0(9)   | 28.9(3)   |
| C40 | 5343.0(19)  | 3871.9(11)  | 5252.0(9)   | 32.4(4)   |
| C41 | 5082(2)     | 3784.8(11)  | 4535.7(9)   | 32.8(4)   |
| C42 | 3605.2(19)  | 3690.7(11)  | 4181.9(9)   | 30.5(4)   |
| P3  | 4795.8(5)   | 847.1(3)    | 3037.7(2)   | 25.41(10) |
| O5  | 900.0(15)   | 1493.5(8)   | 4574.6(7)   | 42.6(3)   |
| O6  | 1731.2(13)  | 234.2(8)    | 4785.7(6)   | 32.1(3)   |
| C43 | 3630.4(18)  | -66.9(10)   | 2374.3(8)   | 25.8(3)   |
| C44 | 2077(2)     | -560.1(11)  | 2373.9(9)   | 33.5(4)   |
| C45 | 1295(2)     | -1239.3(12) | 1850.5(9)   | 39.3(4)   |
| C46 | 2047(2)     | -1436.4(12) | 1317.2(9)   | 39.2(4)   |
| C47 | 3590(2)     | -953.2(13)  | 1310.7(9)   | 39.8(4)   |
| C48 | 4374(2)     | -280.0(12)  | 1836.4(8)   | 32.0(4)   |
| C49 | 4449.7(18)  | 1929.2(10)  | 2693.0(8)   | 25.8(3)   |
| C50 | 5625(2)     | 2763.4(11)  | 2874.3(8)   | 32.9(4)   |
| C51 | 5469(2)     | 3612.6(12)  | 2625.2(10)  | 40.0(4)   |
| C52 | 4154(2)     | 3639.3(12)  | 2188.9(9)   | 38.8(4)   |
| C53 | 2974(2)     | 2820.4(13)  | 2007.7(10)  | 43.3(4)   |
| C54 | 3123(2)     | 1968.8(12)  | 2256.6(9)   | 37.2(4)   |
| C55 | 3543.4(17)  | 621.4(10)   | 3715.3(8)   | 24.3(3)   |
| C56 | 2661.1(19)  | 1187.3(11)  | 3867.5(8)   | 28.3(3)   |
| C57 | 1716.4(19)  | 1014.4(11)  | 4418.8(9)   | 30.8(4)   |
| C58 | 2635.0(18)  | -356.7(10)  | 4647.9(8)   | 26.5(3)   |
| C59 | 3565.3(17)  | -187.5(10)  | 4126.7(8)   | 24.5(3)   |
| C60 | 4482.0(19)  | -806.2(11)  | 4039.6(8)   | 28.6(3)   |
| C61 | 4451.8(19)  | -1549.5(11) | 4453.6(9)   | 31.5(4)   |
| C62 | 3495(2)     | -1705.2(11) | 4962.6(9)   | 32.5(4)   |
| C63 | 2576.7(19)  | -1110.3(11) | 5063.1(8)   | 31.0(4)   |

**Table S4.** Bond Lengths for 4-P.

| Atom | Atom | Length/Å   | Atom | Atom | Length/Å |
|------|------|------------|------|------|----------|
| P1   | C1   | 1.8245(18) | C29  | C30  | 1.385(2) |
| P1   | C13  | 1.8321(16) | C30  | C31  | 1.377(3) |
| P1   | C7   | 1.8321(19) | C31  | C32  | 1.379(3) |

|     |     |            |     |     |            |
|-----|-----|------------|-----|-----|------------|
| O1  | C15 | 1.212(2)   | C32 | C33 | 1.385(2)   |
| O2  | C15 | 1.368(2)   | C34 | C35 | 1.347(2)   |
| O2  | C16 | 1.380(2)   | C34 | C38 | 1.457(2)   |
| C1  | C2  | 1.387(2)   | C35 | C36 | 1.448(2)   |
| C1  | C6  | 1.402(2)   | C37 | C42 | 1.386(2)   |
| C2  | C3  | 1.384(3)   | C37 | C38 | 1.392(2)   |
| C3  | C4  | 1.374(3)   | C38 | C39 | 1.398(2)   |
| C4  | C5  | 1.378(3)   | C39 | C40 | 1.378(2)   |
| C5  | C6  | 1.378(3)   | C40 | C41 | 1.385(2)   |
| C7  | C12 | 1.384(3)   | C41 | C42 | 1.384(2)   |
| C7  | C8  | 1.396(3)   | P3  | C49 | 1.8297(16) |
| C8  | C9  | 1.382(4)   | P3  | C55 | 1.8362(15) |
| C9  | C10 | 1.361(4)   | P3  | C43 | 1.8360(16) |
| C10 | C11 | 1.372(4)   | O5  | C57 | 1.2058(19) |
| C11 | C12 | 1.393(3)   | O6  | C57 | 1.3718(19) |
| C13 | C14 | 1.350(2)   | O6  | C58 | 1.3830(18) |
| C13 | C17 | 1.453(2)   | C43 | C48 | 1.392(2)   |
| C14 | C15 | 1.446(2)   | C43 | C44 | 1.395(2)   |
| C16 | C21 | 1.382(2)   | C44 | C45 | 1.383(2)   |
| C16 | C17 | 1.395(2)   | C45 | C46 | 1.382(3)   |
| C17 | C18 | 1.400(2)   | C46 | C47 | 1.385(3)   |
| C18 | C19 | 1.378(3)   | C47 | C48 | 1.381(2)   |
| C19 | C20 | 1.390(3)   | C49 | C54 | 1.387(2)   |
| C20 | C21 | 1.372(3)   | C49 | C50 | 1.391(2)   |
| P2  | C22 | 1.8256(17) | C50 | C51 | 1.387(2)   |
| P2  | C28 | 1.8311(16) | C51 | C52 | 1.373(3)   |
| P2  | C34 | 1.8413(15) | C52 | C53 | 1.378(3)   |
| O3  | C36 | 1.209(2)   | C53 | C54 | 1.388(2)   |
| O4  | C36 | 1.3672(19) | C55 | C56 | 1.347(2)   |
| O4  | C37 | 1.3785(19) | C55 | C59 | 1.457(2)   |
| C22 | C27 | 1.390(2)   | C56 | C57 | 1.450(2)   |
| C22 | C23 | 1.395(2)   | C58 | C63 | 1.386(2)   |
| C23 | C24 | 1.379(3)   | C58 | C59 | 1.393(2)   |
| C24 | C25 | 1.379(3)   | C59 | C60 | 1.402(2)   |
| C25 | C26 | 1.379(3)   | C60 | C61 | 1.375(2)   |
| C26 | C27 | 1.387(2)   | C61 | C62 | 1.389(2)   |
| C28 | C33 | 1.392(2)   | C62 | C63 | 1.381(2)   |
| C28 | C29 | 1.398(2)   |     |     |            |

**Table S5.** Bond Angles for 4-P.

| Atom | Atom | Atom | Angle/°    | Atom | Atom | Atom | Angle/°    |
|------|------|------|------------|------|------|------|------------|
| C1   | P1   | C13  | 103.39(7)  | C32  | C33  | C28  | 120.53(15) |
| C1   | P1   | C7   | 104.65(8)  | C35  | C34  | C38  | 118.27(14) |
| C13  | P1   | C7   | 100.59(8)  | C35  | C34  | P2   | 123.70(12) |
| C15  | O2   | C16  | 121.54(13) | C38  | C34  | P2   | 117.96(11) |
| C2   | C1   | C6   | 118.03(17) | C34  | C35  | C36  | 122.79(15) |
| C2   | C1   | P1   | 124.12(14) | O3   | C36  | O4   | 116.86(15) |
| C6   | C1   | P1   | 117.63(13) | O3   | C36  | C35  | 125.60(16) |
| C3   | C2   | C1   | 120.60(18) | O4   | C36  | C35  | 117.54(14) |
| C4   | C3   | C2   | 120.61(19) | O4   | C37  | C42  | 116.05(14) |
| C3   | C4   | C5   | 119.8(2)   | O4   | C37  | C38  | 121.80(13) |
| C6   | C5   | C4   | 120.03(19) | C42  | C37  | C38  | 122.14(15) |
| C5   | C6   | C1   | 120.94(17) | C37  | C38  | C39  | 117.55(14) |
| C12  | C7   | C8   | 118.6(2)   | C37  | C38  | C34  | 118.27(14) |
| C12  | C7   | P1   | 124.06(14) | C39  | C38  | C34  | 124.18(14) |
| C8   | C7   | P1   | 117.27(17) | C40  | C39  | C38  | 120.88(16) |
| C9   | C8   | C7   | 120.3(3)   | C39  | C40  | C41  | 120.37(16) |
| C10  | C9   | C8   | 120.4(3)   | C42  | C41  | C40  | 120.16(15) |
| C9   | C10  | C11  | 120.6(2)   | C41  | C42  | C37  | 118.90(15) |
| C10  | C11  | C12  | 119.7(3)   | C49  | P3   | C55  | 102.59(7)  |
| C7   | C12  | C11  | 120.5(2)   | C49  | P3   | C43  | 102.36(7)  |
| C14  | C13  | C17  | 118.42(14) | C55  | P3   | C43  | 99.47(7)   |
| C14  | C13  | P1   | 123.26(13) | C57  | O6   | C58  | 121.62(12) |
| C17  | C13  | P1   | 118.23(12) | C48  | C43  | C44  | 118.27(15) |
| C13  | C14  | C15  | 122.69(16) | C48  | C43  | P3   | 116.73(12) |
| O1   | C15  | O2   | 117.16(15) | C44  | C43  | P3   | 125.01(12) |
| O1   | C15  | C14  | 125.35(16) | C45  | C44  | C43  | 120.81(16) |
| O2   | C15  | C14  | 117.49(15) | C46  | C45  | C44  | 120.15(17) |
| O2   | C16  | C21  | 116.10(16) | C45  | C46  | C47  | 119.70(16) |
| O2   | C16  | C17  | 121.42(15) | C48  | C47  | C46  | 120.12(16) |
| C21  | C16  | C17  | 122.48(17) | C47  | C48  | C43  | 120.93(16) |
| C16  | C17  | C18  | 117.12(16) | C54  | C49  | C50  | 118.32(15) |
| C16  | C17  | C13  | 118.38(15) | C54  | C49  | P3   | 124.71(12) |



|     |     |     |            |     |     |     |            |
|-----|-----|-----|------------|-----|-----|-----|------------|
| C18 | C17 | C13 | 124.51(15) | C50 | C49 | P3  | 116.95(12) |
| C19 | C18 | C17 | 120.86(18) | C51 | C50 | C49 | 120.68(16) |
| C18 | C19 | C20 | 120.22(18) | C52 | C51 | C50 | 120.33(16) |
| C21 | C20 | C19 | 120.35(18) | C51 | C52 | C53 | 119.74(16) |
| C20 | C21 | C16 | 118.96(19) | C52 | C53 | C54 | 120.13(17) |
| C22 | P2  | C28 | 104.32(7)  | C49 | C54 | C53 | 120.79(16) |
| C22 | P2  | C34 | 103.09(7)  | C56 | C55 | C59 | 118.73(14) |
| C28 | P2  | C34 | 99.80(7)   | C56 | C55 | P3  | 123.24(12) |
| C36 | O4  | C37 | 121.28(12) | C59 | C55 | P3  | 117.97(11) |
| C27 | C22 | C23 | 118.58(16) | C55 | C56 | C57 | 122.48(14) |
| C27 | C22 | P2  | 124.98(13) | O5  | C57 | O6  | 117.29(14) |
| C23 | C22 | P2  | 116.39(13) | O5  | C57 | C56 | 125.27(15) |
| C24 | C23 | C22 | 120.77(18) | O6  | C57 | C56 | 117.43(14) |
| C23 | C24 | C25 | 120.04(18) | O6  | C58 | C63 | 116.26(14) |
| C26 | C25 | C24 | 120.03(18) | O6  | C58 | C59 | 121.33(13) |
| C25 | C26 | C27 | 120.18(19) | C63 | C58 | C59 | 122.40(14) |
| C26 | C27 | C22 | 120.38(17) | C58 | C59 | C60 | 117.33(14) |
| C33 | C28 | C29 | 118.78(14) | C58 | C59 | C55 | 118.37(14) |
| C33 | C28 | P2  | 124.19(12) | C60 | C59 | C55 | 124.29(14) |
| C29 | C28 | P2  | 116.95(12) | C61 | C60 | C59 | 120.90(15) |
| C30 | C29 | C28 | 120.22(16) | C60 | C61 | C62 | 120.26(15) |
| C31 | C30 | C29 | 120.22(16) | C63 | C62 | C61 | 120.42(15) |
| C30 | C31 | C32 | 120.25(16) | C62 | C63 | C58 | 118.67(15) |
| C31 | C32 | C33 | 119.99(16) |     |     |     |            |

**Table S6.** Fractional Atomic Coordinates ( $\times 10^4$ ) and Equivalent Isotropic Displacement Parameters ( $\text{\AA}^2 \times 10^3$ ) for **7P-4Me**. U<sub>eq</sub> is defined as 1/3 of the trace of the orthogonalised UJ tensor.

| Atom | x           | y          | z         | U(eq)     |
|------|-------------|------------|-----------|-----------|
| P11  | 5865.9(5)   | 6061.4(3)  | 6547.6(2) | 15.16(12) |
| O1   | 9417.7(14)  | 6110.2(10) | 5136.4(4) | 22.3(3)   |
| O24  | 11223.7(15) | 6057.3(11) | 4576.3(5) | 30.8(4)   |
| C12  | 6470.1(19)  | 7204.7(12) | 6731.5(6) | 14.7(3)   |
| C2   | 7799(2)     | 6154.8(13) | 5290.2(6) | 17.5(4)   |
| C13  | 6636(2)     | 7954.6(13) | 6444.8(6) | 17.3(4)   |
| C18  | 3638(2)     | 6039.3(12) | 6663.2(6) | 15.3(3)   |
| C15  | 7611(2)     | 8873.5(13) | 7061.0(6) | 19.2(4)   |
| C16  | 7451(2)     | 8138.8(13) | 7347.3(6) | 20.3(4)   |
| C4   | 5996(2)     | 6160.6(12) | 5934.2(6) | 16.7(3)   |
| C23  | 3000(2)     | 5220.9(13) | 6826.1(6) | 19.3(4)   |
| C7   | 6458(2)     | 6222.3(12) | 4991.3(6) | 17.3(4)   |
| C3   | 7590(2)     | 6117.4(13) | 5750.0(6) | 17.3(4)   |
| C5   | 4633(2)     | 6224.1(13) | 5641.4(6) | 19.6(4)   |
| C17  | 6891(2)     | 7305.1(13) | 7186.7(6) | 18.2(4)   |
| C21  | 289(2)      | 5886.4(14) | 6885.1(6) | 21.3(4)   |
| C14  | 7196(2)     | 8784.5(13) | 6608.9(6) | 18.8(4)   |
| C22  | 1321(2)     | 5143.6(14) | 6935.0(6) | 23.1(4)   |
| C20  | 903(2)      | 6706.8(13) | 6722.5(6) | 19.9(4)   |
| C19  | 2573(2)     | 6783.7(13) | 6611.4(6) | 18.3(4)   |
| C6   | 4859(2)     | 6254.1(13) | 5180.1(6) | 20.4(4)   |
| C10  | 9774(2)     | 6102.3(14) | 4681.0(6) | 23.1(4)   |
| C8   | 6795(2)     | 6228.2(13) | 4510.8(6) | 19.2(4)   |
| C9   | 8384(2)     | 6156.8(14) | 4373.8(6) | 23.0(4)   |
| C25  | 5382(2)     | 6321.7(15) | 4185.7(6) | 24.9(4)   |

**Table S7.** Bond Lengths for **7P-4Me**.

| Atom | Atom | Length/\AA | Atom | Atom | Length/\AA |
|------|------|------------|------|------|------------|
| P11  | C12  | 1.8303(18) | C15  | C14  | 1.391(2)   |
| P11  | C18  | 1.8290(17) | C16  | C17  | 1.389(3)   |
| P11  | C4   | 1.8323(18) | C4   | C3   | 1.399(2)   |
| O1   | C2   | 1.3847(19) | C4   | C5   | 1.405(2)   |
| O1   | C10  | 1.384(2)   | C23  | C22  | 1.397(2)   |
| O24  | C10  | 1.212(2)   | C7   | C6   | 1.406(2)   |
| C12  | C13  | 1.398(2)   | C7   | C8   | 1.454(2)   |
| C12  | C17  | 1.403(2)   | C5   | C6   | 1.384(3)   |
| C2   | C7   | 1.403(2)   | C21  | C22  | 1.379(3)   |
| C2   | C3   | 1.378(2)   | C21  | C20  | 1.388(3)   |
| C13  | C14  | 1.387(3)   | C20  | C19  | 1.391(2)   |
| C18  | C23  | 1.393(3)   | C10  | C9   | 1.448(3)   |
| C18  | C19  | 1.398(2)   | C8   | C9   | 1.348(2)   |
| C15  | C16  | 1.379(3)   | C8   | C25  | 1.500(2)   |

**Table S8.** Bond Angles for **7P-4Me**.

| Atom | Atom | Atom | Angle/°    | Atom | Atom | Atom | Angle/°    |
|------|------|------|------------|------|------|------|------------|
| C12  | P11  | C4   | 102.08(8)  | C2   | C7   | C6   | 117.12(16) |
| C18  | P11  | C12  | 102.80(8)  | C2   | C7   | C8   | 118.59(15) |
| C18  | P11  | C4   | 104.15(7)  | C6   | C7   | C8   | 124.26(16) |
| C10  | O1   | C2   | 121.26(14) | C2   | C3   | C4   | 119.92(16) |
| C13  | C12  | P11  | 124.38(14) | C6   | C5   | C4   | 120.87(16) |
| C13  | C12  | C17  | 118.84(16) | C16  | C17  | C12  | 120.18(17) |
| C17  | C12  | P11  | 116.65(13) | C22  | C21  | C20  | 120.51(16) |
| O1   | C2   | C7   | 121.38(16) | C13  | C14  | C15  | 120.02(17) |
| C3   | C2   | O1   | 116.14(15) | C21  | C22  | C23  | 119.71(18) |
| C3   | C2   | C7   | 122.47(15) | C21  | C20  | C19  | 119.87(17) |
| C14  | C13  | C12  | 120.50(16) | C20  | C19  | C18  | 120.34(17) |
| C23  | C18  | P11  | 116.32(13) | C5   | C6   | C7   | 120.99(16) |
| C23  | C18  | C19  | 118.99(15) | O1   | C10  | C9   | 117.14(15) |
| C19  | C18  | P11  | 124.66(14) | O24  | C10  | O1   | 116.87(16) |
| C16  | C15  | C14  | 120.02(17) | O24  | C10  | C9   | 125.99(17) |
| C15  | C16  | C17  | 120.44(16) | C7   | C8   | C25  | 119.44(15) |
| C3   | C4   | P11  | 116.02(13) | C9   | C8   | C7   | 118.30(16) |
| C3   | C4   | C5   | 118.61(16) | C9   | C8   | C25  | 122.25(17) |
| C5   | C4   | P11  | 125.27(13) | C8   | C9   | C10  | 123.29(17) |
| C18  | C23  | C22  | 120.57(17) |      |      |      |            |

**Table S9.** Fractional Atomic Coordinates ( $\times 10^4$ ) and Equivalent Isotropic Displacement Parameters ( $\text{\AA}^2 \times 10^3$ ) for **7P-3COMe**. U<sub>eq</sub> is defined as 1/3 of the trace of the orthogonalised UJ tensor.

| Atom | x           | y          | z         | U(eq)     |
|------|-------------|------------|-----------|-----------|
| P11  | 7984.1(5)   | 5101.1(5)  | 3816.1(7) | 18.85(18) |
| O10  | 5729.9(13)  | 3317.1(13) | 134.1(18) | 20.9(4)   |
| O25  | 2183.3(14)  | 3616.0(14) | -268(2)   | 28.6(5)   |
| O27  | 4917.7(15)  | 2414.6(15) | -1401(2)  | 35.3(5)   |
| C12  | 7803.1(19)  | 4538.2(18) | 5485(3)   | 18.9(5)   |
| C23  | 9140.1(19)  | 4471.7(19) | 1715(3)   | 20.8(5)   |
| C2   | 6703.9(18)  | 4163.9(17) | 1807(3)   | 18.2(5)   |
| C6   | 4906.8(18)  | 4410.2(17) | 1631(2)   | 17.5(5)   |
| C18  | 8836.2(18)  | 4249.1(17) | 3039(3)   | 17.8(5)   |
| C8   | 3928.0(18)  | 3465.9(17) | -56(3)    | 18.4(5)   |
| C5   | 4999(2)     | 5067.0(18) | 2736(3)   | 21.7(5)   |
| C1   | 5772.5(18)  | 3977.8(17) | 1190(2)   | 17.6(5)   |
| C24  | 2909.6(19)  | 3197.6(19) | -668(3)   | 22.0(5)   |
| C3   | 6790.8(19)  | 4801.6(17) | 2907(3)   | 18.9(5)   |
| C22  | 9781(2)     | 3860.7(19) | 1050(3)   | 22.7(5)   |
| C13  | 8345.7(19)  | 4929.1(18) | 6617(3)   | 20.7(5)   |
| C17  | 7176.5(19)  | 3746.5(17) | 5683(3)   | 19.9(5)   |
| C9   | 4838.6(19)  | 3012.6(18) | -519(3)   | 21.4(5)   |
| C16  | 7101(2)     | 3349.8(18) | 6987(3)   | 21.2(5)   |
| C4   | 5922(2)     | 5259.2(19) | 3352(3)   | 22.2(5)   |
| C7   | 3978.8(18)  | 4132.8(18) | 962(3)    | 19.2(5)   |
| C15  | 7663(2)     | 3733.4(19) | 8102(3)   | 22.4(5)   |
| C19  | 9220(2)     | 3417.2(19) | 3683(3)   | 22.8(5)   |
| C20  | 9877(2)     | 2818.5(19) | 3022(3)   | 24.3(6)   |
| C21  | 10152.6(19) | 3032.0(19) | 1704(3)   | 22.8(5)   |
| C14  | 8279(2)     | 4521(2)    | 7913(3)   | 23.9(6)   |
| C26  | 2806(2)     | 2427(2)    | -1747(3)  | 34.6(7)   |

**Table S10.** Bond Angles for **7P-3COMe**.

| Atom | Atom | Atom | Angle/°    | Atom | Atom | Atom | Angle/°    |
|------|------|------|------------|------|------|------|------------|
| C12  | P11  | C18  | 101.96(11) | C2   | C1   | C6   | 122.3(2)   |
| C12  | P11  | C3   | 100.47(11) | O25  | C24  | C8   | 118.7(2)   |
| C18  | P11  | C3   | 101.67(11) | O25  | C24  | C26  | 121.1(2)   |
| C1   | O10  | C9   | 123.1(2)   | C26  | C24  | C8   | 120.1(2)   |
| C13  | C12  | P11  | 116.73(19) | C2   | C3   | P11  | 123.57(19) |
| C17  | C12  | P11  | 124.21(19) | C2   | C3   | C4   | 118.8(2)   |
| C17  | C12  | C13  | 119.1(2)   | C4   | C3   | P11  | 117.58(19) |
| C22  | C23  | C18  | 120.6(2)   | C23  | C22  | C21  | 120.2(2)   |
| C1   | C2   | C3   | 119.5(2)   | C14  | C13  | C12  | 120.3(2)   |
| C5   | C6   | C7   | 124.3(2)   | C16  | C17  | C12  | 120.3(2)   |
| C1   | C6   | C5   | 118.0(2)   | O10  | C9   | C8   | 116.2(2)   |
| C1   | C6   | C7   | 117.7(2)   | O27  | C9   | O10  | 115.5(2)   |
| C23  | C18  | P11  | 117.00(19) | O27  | C9   | C8   | 128.3(2)   |

|     |     |     |          |     |     |     |          |
|-----|-----|-----|----------|-----|-----|-----|----------|
| C19 | C18 | P11 | 124.6(2) | C17 | C16 | C15 | 120.0(2) |
| C19 | C18 | C23 | 118.4(2) | C5  | C4  | C3  | 121.2(2) |
| C9  | C8  | C24 | 121.7(2) | C8  | C7  | C6  | 121.9(2) |
| C7  | C8  | C24 | 117.9(2) | C14 | C15 | C16 | 119.8(2) |
| C7  | C8  | C9  | 120.3(2) | C20 | C19 | C18 | 120.7(2) |
| C4  | C5  | C6  | 120.1(2) | C21 | C20 | C19 | 120.5(2) |
| O10 | C1  | C2  | 116.9(2) | C20 | C21 | C22 | 119.6(3) |
| O10 | C1  | C6  | 120.8(2) | C15 | C14 | C13 | 120.4(2) |

**Table S11.** Fractional Atomic Coordinates ( $\times 10^4$ ) and Equivalent Isotropic Displacement Parameters ( $\text{\AA}^2 \times 10^3$ ) for **7P-3COOEt**. Ueq is defined as 1/3 of the trace of the orthogonalised UIJ tensor.

| Atom | x           | y          | z         | U(eq)     |
|------|-------------|------------|-----------|-----------|
| P11  | 5865.9(5)   | 6061.4(3)  | 6547.6(2) | 15.16(12) |
| O1   | 9417.7(14)  | 6110.2(10) | 5136.4(4) | 22.3(3)   |
| O24  | 11223.7(15) | 6057.3(11) | 4576.3(5) | 30.8(4)   |
| C12  | 6470.1(19)  | 7204.7(12) | 6731.5(6) | 14.7(3)   |
| C2   | 7799(2)     | 6154.8(13) | 5290.2(6) | 17.5(4)   |
| C13  | 6636(2)     | 7954.6(13) | 6444.8(6) | 17.3(4)   |
| C18  | 3638(2)     | 6039.3(12) | 6663.2(6) | 15.3(3)   |
| C15  | 7611(2)     | 8873.5(13) | 7061.0(6) | 19.2(4)   |
| C16  | 7451(2)     | 8138.8(13) | 7347.3(6) | 20.3(4)   |
| C4   | 5996(2)     | 6160.6(12) | 5934.2(6) | 16.7(3)   |
| C23  | 3000(2)     | 5220.9(13) | 6826.1(6) | 19.3(4)   |
| C7   | 6458(2)     | 6222.3(12) | 4991.3(6) | 17.3(4)   |
| C3   | 7590(2)     | 6117.4(13) | 5750.0(6) | 17.3(4)   |
| C5   | 4633(2)     | 6224.1(13) | 5641.4(6) | 19.6(4)   |
| C17  | 6891(2)     | 7305.1(13) | 7186.7(6) | 18.2(4)   |
| C21  | 289(2)      | 5886.4(14) | 6885.1(6) | 21.3(4)   |
| C14  | 7196(2)     | 8784.5(13) | 6608.9(6) | 18.8(4)   |
| C22  | 1321(2)     | 5143.6(14) | 6935.0(6) | 23.1(4)   |
| C20  | 903(2)      | 6706.8(13) | 6722.5(6) | 19.9(4)   |
| C19  | 2573(2)     | 6783.7(13) | 6611.4(6) | 18.3(4)   |
| C6   | 4859(2)     | 6254.1(13) | 5180.1(6) | 20.4(4)   |
| C10  | 9774(2)     | 6102.3(14) | 4681.0(6) | 23.1(4)   |
| C8   | 6795(2)     | 6228.2(13) | 4510.8(6) | 19.2(4)   |
| C9   | 8384(2)     | 6156.8(14) | 4373.8(6) | 23.0(4)   |
| C25  | 5382(2)     | 6321.7(15) | 4185.7(6) | 24.9(4)   |

**Table S12.** Bond Lengths for **7P-3COOEt**.

| Atom | Atom | Length/\AA | Atom | Atom | Length/\AA |
|------|------|------------|------|------|------------|
| P11  | C12  | 1.8303(18) | C15  | C14  | 1.391(2)   |
| P11  | C18  | 1.8290(17) | C16  | C17  | 1.389(3)   |
| P11  | C4   | 1.8323(18) | C4   | C3   | 1.399(2)   |
| O1   | C2   | 1.3847(19) | C4   | C5   | 1.405(2)   |
| O1   | C10  | 1.384(2)   | C23  | C22  | 1.397(2)   |
| O24  | C10  | 1.212(2)   | C7   | C6   | 1.406(2)   |
| C12  | C13  | 1.398(2)   | C7   | C8   | 1.454(2)   |
| C12  | C17  | 1.403(2)   | C5   | C6   | 1.384(3)   |
| C2   | C7   | 1.403(2)   | C21  | C22  | 1.379(3)   |
| C2   | C3   | 1.378(2)   | C21  | C20  | 1.388(3)   |
| C13  | C14  | 1.387(3)   | C20  | C19  | 1.391(2)   |
| C18  | C23  | 1.393(3)   | C10  | C9   | 1.448(3)   |
| C18  | C19  | 1.398(2)   | C8   | C9   | 1.348(2)   |
| C15  | C16  | 1.379(3)   | C8   | C25  | 1.500(2)   |

**Table S13.** Bond Angles for **7P-3COOEt**.

| Atom | Atom | Atom | Angle/ $^\circ$ | Atom | Atom | Atom | Angle/ $^\circ$ |
|------|------|------|-----------------|------|------|------|-----------------|
| C12  | P11  | C4   | 102.08(8)       | C2   | C7   | C6   | 117.12(16)      |
| C18  | P11  | C12  | 102.80(8)       | C2   | C7   | C8   | 118.59(15)      |
| C18  | P11  | C4   | 104.15(7)       | C6   | C7   | C8   | 124.26(16)      |
| C10  | O1   | C2   | 121.26(14)      | C2   | C3   | C4   | 119.92(16)      |
| C13  | C12  | P11  | 124.38(14)      | C6   | C5   | C4   | 120.87(16)      |
| C13  | C12  | C17  | 118.84(16)      | C16  | C17  | C12  | 120.18(17)      |
| C17  | C12  | P11  | 116.65(13)      | C22  | C21  | C20  | 120.51(16)      |
| O1   | C2   | C7   | 121.38(16)      | C13  | C14  | C15  | 120.02(17)      |
| C3   | C2   | O1   | 116.14(15)      | C21  | C22  | C23  | 119.71(18)      |
| C3   | C2   | C7   | 122.47(15)      | C21  | C20  | C19  | 119.87(17)      |
| C14  | C13  | C12  | 120.50(16)      | C20  | C19  | C18  | 120.34(17)      |
| C23  | C18  | P11  | 116.32(13)      | C5   | C6   | C7   | 120.99(16)      |
| C23  | C18  | C19  | 118.99(15)      | O1   | C10  | C9   | 117.14(15)      |

|     |     |     |            |     |     |     |            |
|-----|-----|-----|------------|-----|-----|-----|------------|
| C19 | C18 | P11 | 124.66(14) | O24 | C10 | O1  | 116.87(16) |
| C16 | C15 | C14 | 120.02(17) | O24 | C10 | C9  | 125.99(17) |
| C15 | C16 | C17 | 120.44(16) | C7  | C8  | C25 | 119.44(15) |
| C3  | C4  | P11 | 116.02(13) | C9  | C8  | C7  | 118.30(16) |
| C3  | C4  | C5  | 118.61(16) | C9  | C8  | C25 | 122.25(17) |
| C5  | C4  | P11 | 125.27(13) | C8  | C9  | C10 | 123.29(17) |
| C18 | C23 | C22 | 120.57(17) |     |     |     |            |

#### 4. Discussion on the Stability of DPP-modified AIEgens.

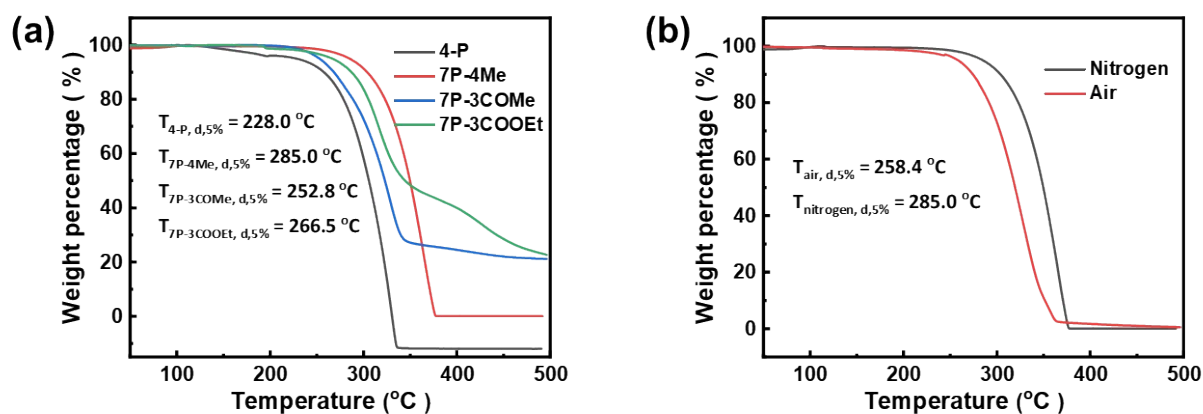

**Figure S24.** Thermostability of **4-P**, **7P-4Me**, **7P-3COMe** and **7P-3COOEt** in solid state. (a) The thermogravimetric analysis (TGA) curves of all above compounds under nitrogen atmosphere; (b) The TGA curves of **7P-4Me** under nitrogen and air atmosphere.

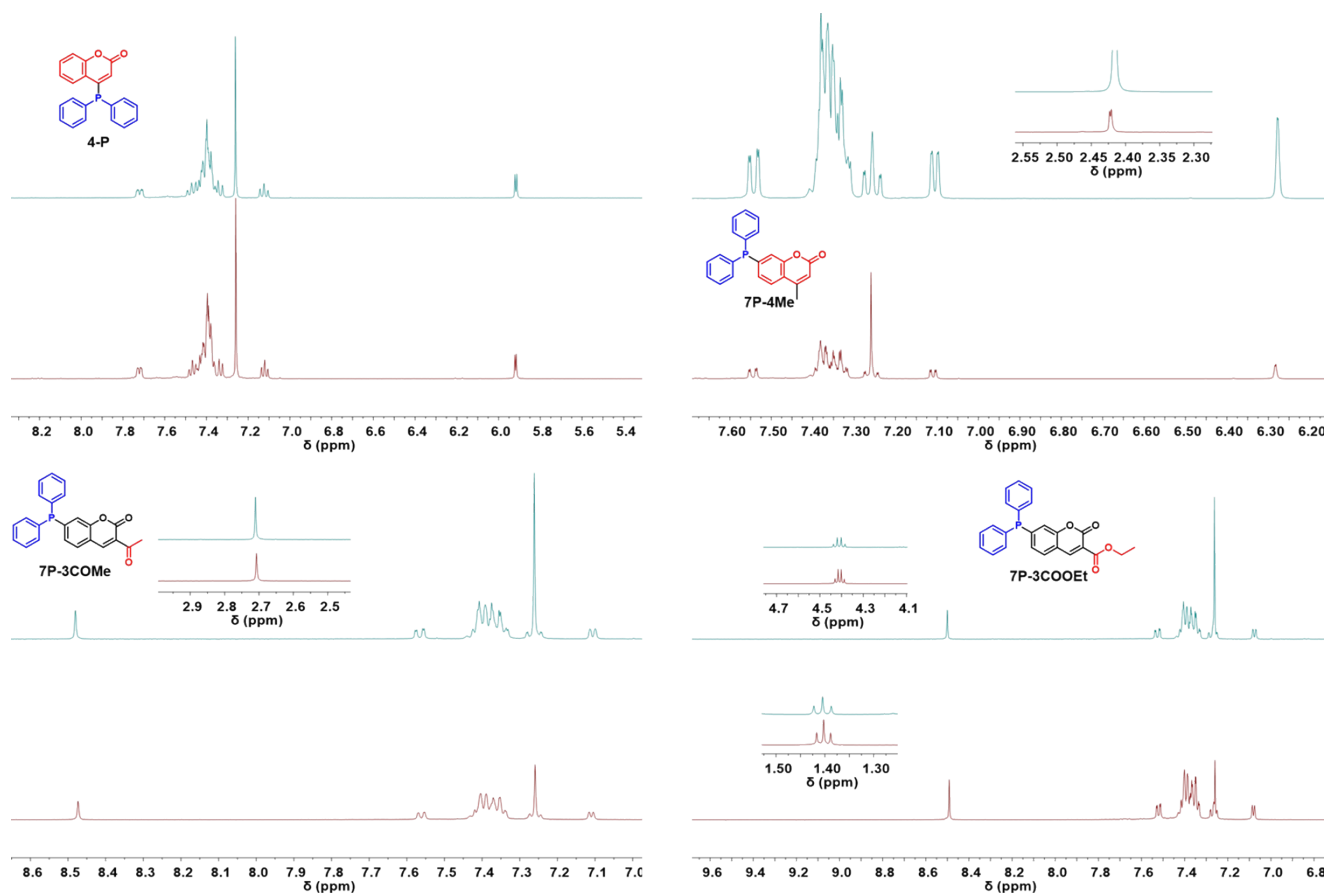

**Figure S25.** Photostability of **4-P**, **7P-4Me**, **7P-3COMe** and **7P-3COOEt** in solid state. The green lines represent the <sup>1</sup>H NMR data of initial compounds, and the red lines represent the <sup>1</sup>H NMR data after storage for ca. 2 years and UV light irradiation for 1.8 h (UV irradiation wavelength: 365 nm; power of UV lamp: 6 W).

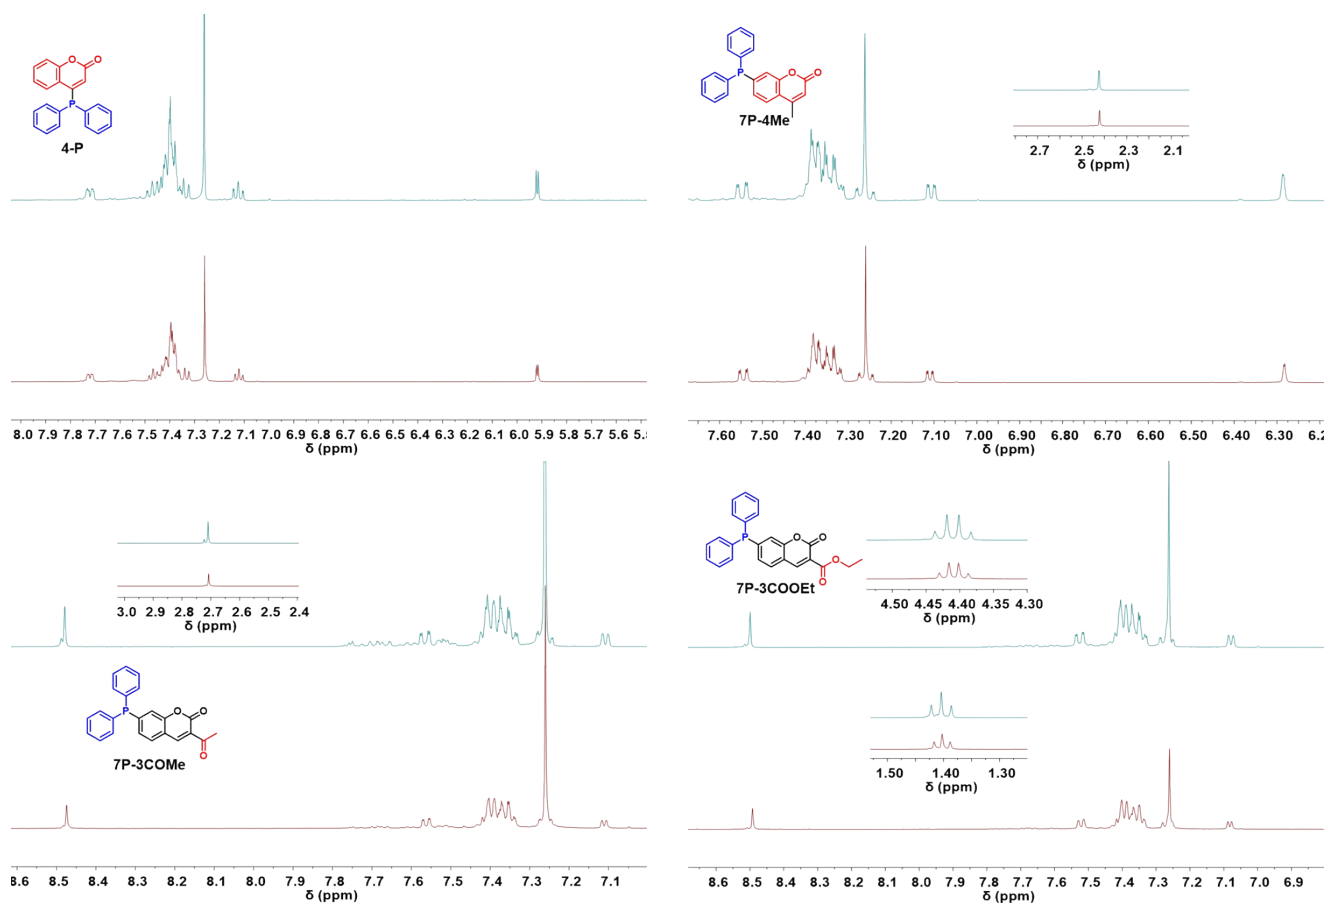

**Figure S26.** Photostability of **4-P**, **7P-4Me**, **7P-3COMe** and **7P-3COEt** in solution. The green lines represent the <sup>1</sup>H NMR data of initial compounds in degassed CDCl<sub>3</sub>, and the red lines represent the <sup>1</sup>H NMR data of the solution after storage for 24 h and UV light irradiation for 1 h (UV irradiation wavelength: 365 nm; power of UV lamp: 6 W).

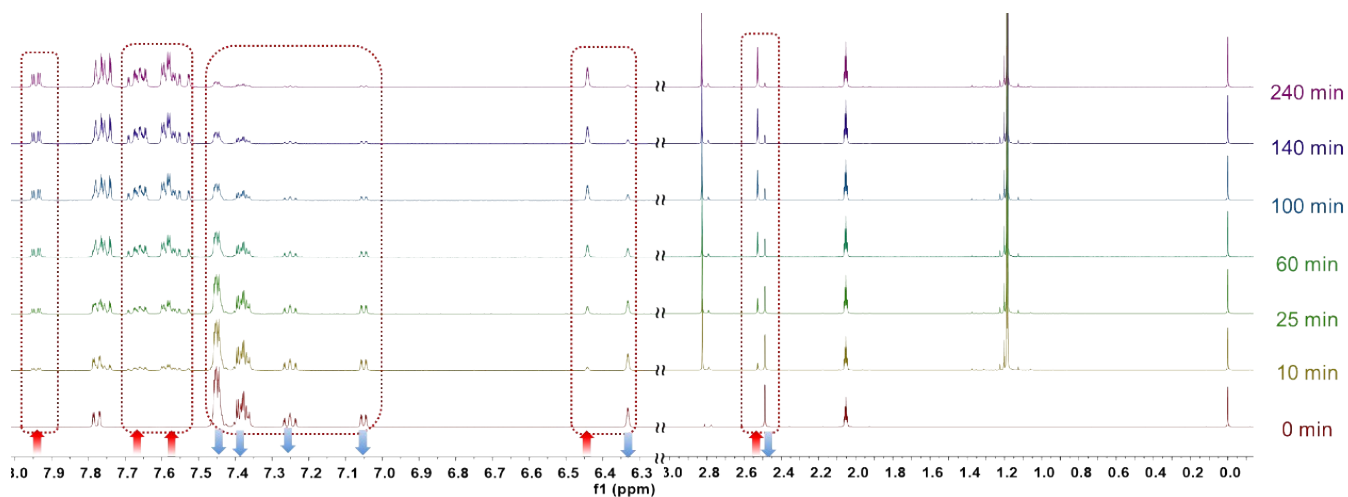

**Figure S27.** Oxidation process of **7P-4Me** monitored via <sup>1</sup>H NMR spectroscopy in degassed D<sub>6</sub>-acetone containing 1.2 equiv *tert*-butyl hydroperoxide under UV light irradiation (**7P-4Me** is stable in the presence of oxidant without the external UV light irradiation. UV irradiation wavelength: 365 nm; power of UV lamp: 6 W. the corresponding oxidation product **7PO-4Me** was characterized by <sup>1</sup>H NMR and HRMS. **7PO-4Me**: <sup>1</sup>H NMR (500 MHz, D<sub>6</sub>-acetone) δ 7.94 (dd, *J* = 8.0, 3.0 Hz, 1H), 7.76 (ddd, *J* = 11.9, 8.3, 1.4 Hz, 4H), 7.70–7.64 (m, 3H), 7.61–7.56 (m, 4H), 7.54 (dd, *J* = 12.3, 1.4 Hz, 1H), 6.44 (d, *J* = 1.4 Hz, 1H), 2.53 (d, *J* = 1.4 Hz, 3H); HRMS (ESI): *m/z* cal for C<sub>22</sub>H<sub>18</sub>O<sub>3</sub>P [M + H]<sup>+</sup>: 361.0988; found: 361.0990.).

## 5. References

- 1 Y. Zhao, D. G. Truhlar, *Theor. Chem. Acc.* **2008**, *120*, 215.
- 2 B. P. Pritchard, D. Altarawy, B. Didier, T. D. Gibson, T. L. Windus, *Journal of chemical information and modeling* **2019**, *59*, 4814.
- 3 M. J. T. Frisch, G. W.; Schlegel, H. B.; Scuseria, G. E.; Robb, M. A.; Cheeseman, J. R.; Scalmani, G.; Barone, V.; Mennucci, B.; Petersson, G. A.; Nakatsuji, H.; Caricato, M.; Li, X.; Hratchian, H. P.; Izmaylov, A. F.; Bloino, J.; Zheng, G.; Sonnenberg, J. L.; Hada, M.; Ehara, M.; Toyota, K.; Fukuda, R.; Hasegawa, J.; Ishida, M.; Nakajima, T.; Honda, Y.; Kitao, O.; Nakai, H.; Vreven, T.; Montgomery, J. A., Jr.; Peralta, J. E.; Ogliaro, F.; Bearpark, M.; Heyd, J. J.; Brothers, E.; Kudin, K. N.; Staroverov, V. N.; Kobayashi, R.; Normand, J.; Raghavachari, K.; Rendell, A.; Burant, J. C.; Iyengar, S. S.; Tomasi, J.; Cossi, M.; Rega, N.; Millam, J. M.; Klene, M.; Knox, J. E.; Cross, J. B.; Bakken, V.; Adamo, C.; Jaramillo, J.; Gomperts, R.; Stratmann, R. E.; Yazyev, O.; Austin, A. J.; Cammi, R.; Pomelli, C.; Ochterski, J. W.; Martin, R. L.; Morokuma, K.; Zakrzewski, V. G.; Voth, G. A.; Salvador, P.; Dannenberg, J. J.; Dapprich, S.; Daniels, A. D.; Farkas, O.; Foresman, J. B.; Ortiz, J. V.; Cioslowski, J.; Fox, D. J. Gaussian 09, revision D.01; Gaussian, Inc.: Wallingford, CT, 2013.
- 4 F. Neese, *WIREs Computational Molecular Science* **2018**, *8*, e1327; B. de Souza, G. Farias, F. Neese, R. Izsák, *Journal of Chemical Theory and Computation* **2019**, *15*, 1896.
- 5 M. S. Hofmayer, F. H. Lutter, L. Grokenberger, J. M. Hammann, P. Knochel, *Org. Lett.* **2019**, *21*, 36.
- 6 M. J. Ong, R. Srinivasan, A. Romieu, J. A. Richard, *Org. Lett.* **2016**, *18*, 5122; T. Remarchuk, R. Angelaud, D. Askin, A. Kumar, A. S. Thompson, H. Cheng, J. F. Reichwein, Y. Chen, F. St-Jean, *Organic Process Research & Development* **2019**, *23*, 775.
- 7 N. Velusamy, A. Binoy, K. N. Bobba, D. Nedungadi, N. Mishra, S. Bhuniya, *Chem. Commun.* **2017**, *53*, 8802.
- 8 K. S. Kumar, M. S. Ramulu, N. P. Kumar, *New J. Chem.* **2018**, *42*, 11276.
- 9 B. Zhang, D. Zhan, X. Zhang, Q. Xiang, Q. Zeng, *Acta Chim. Sinica* **2012**, *70*, 1655.

## 6. NMR Spectra of Synthesized Compounds

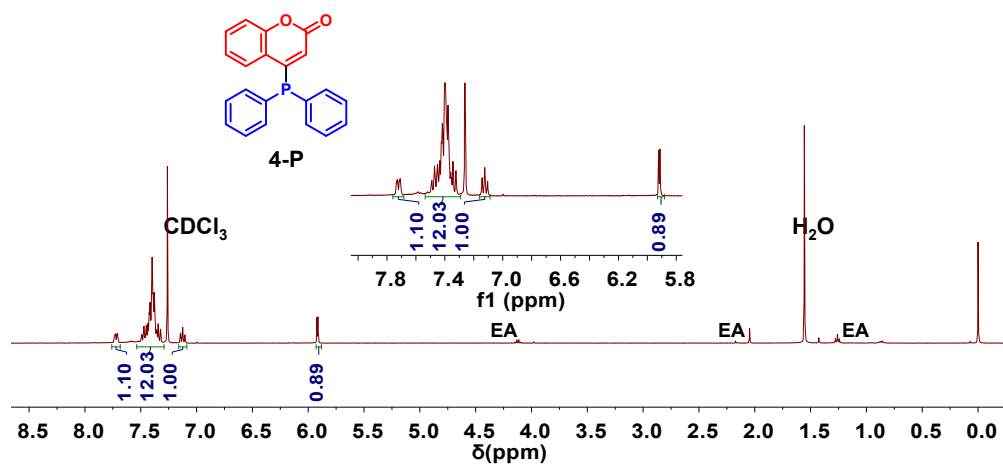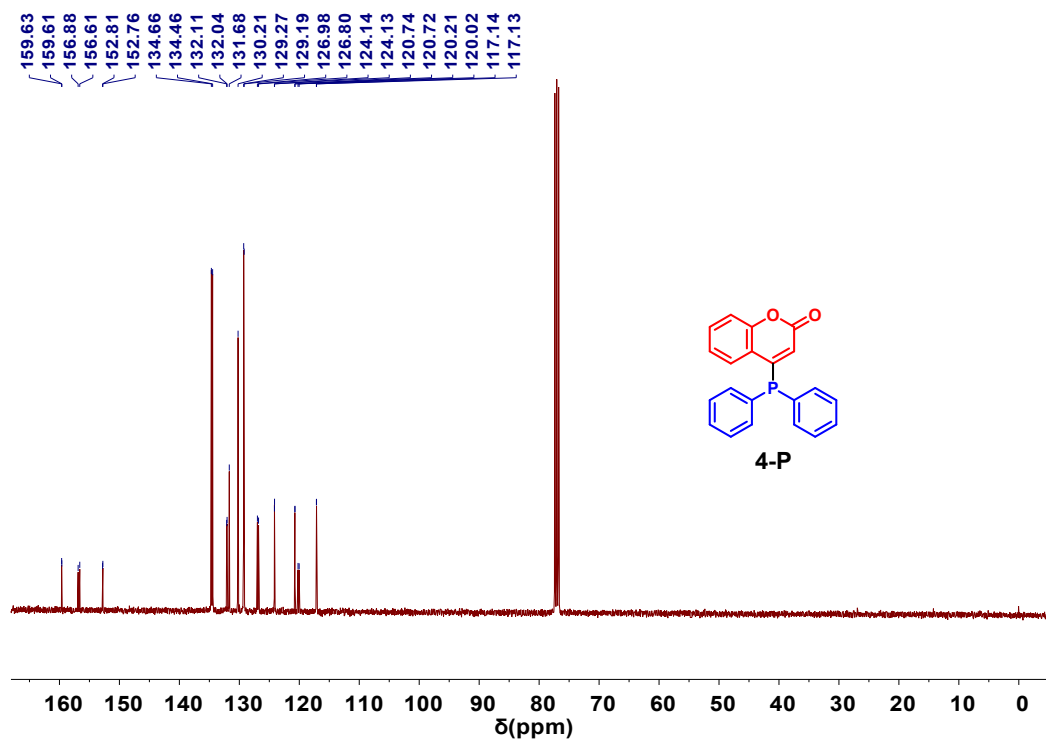

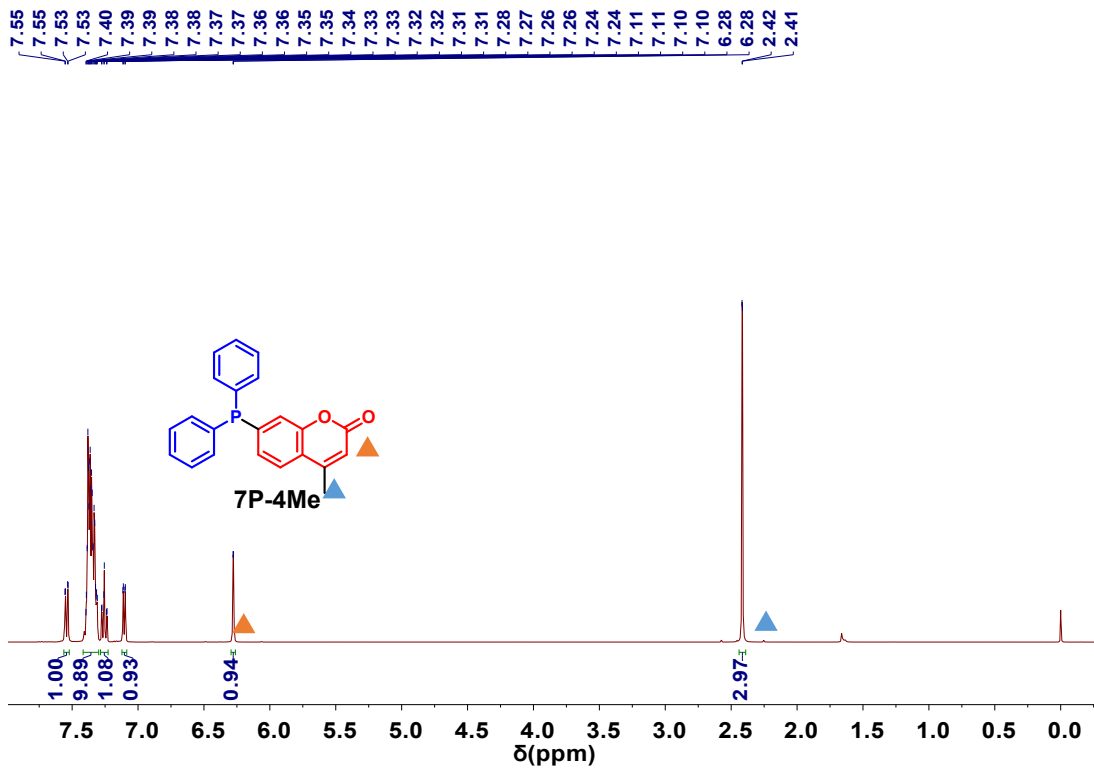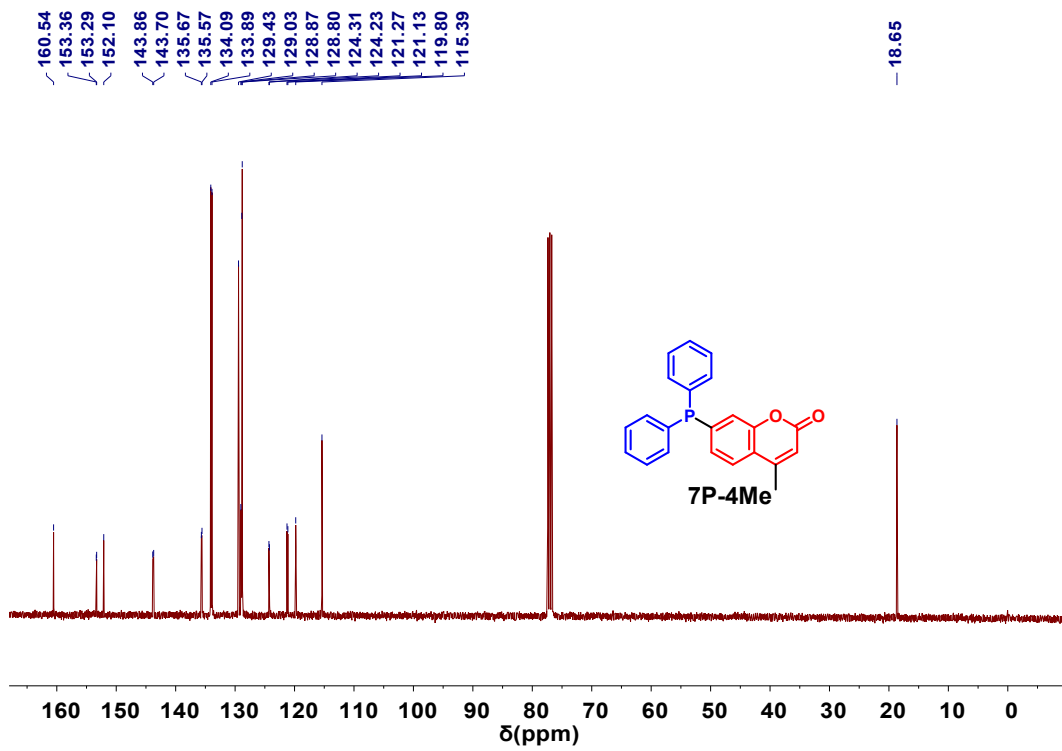



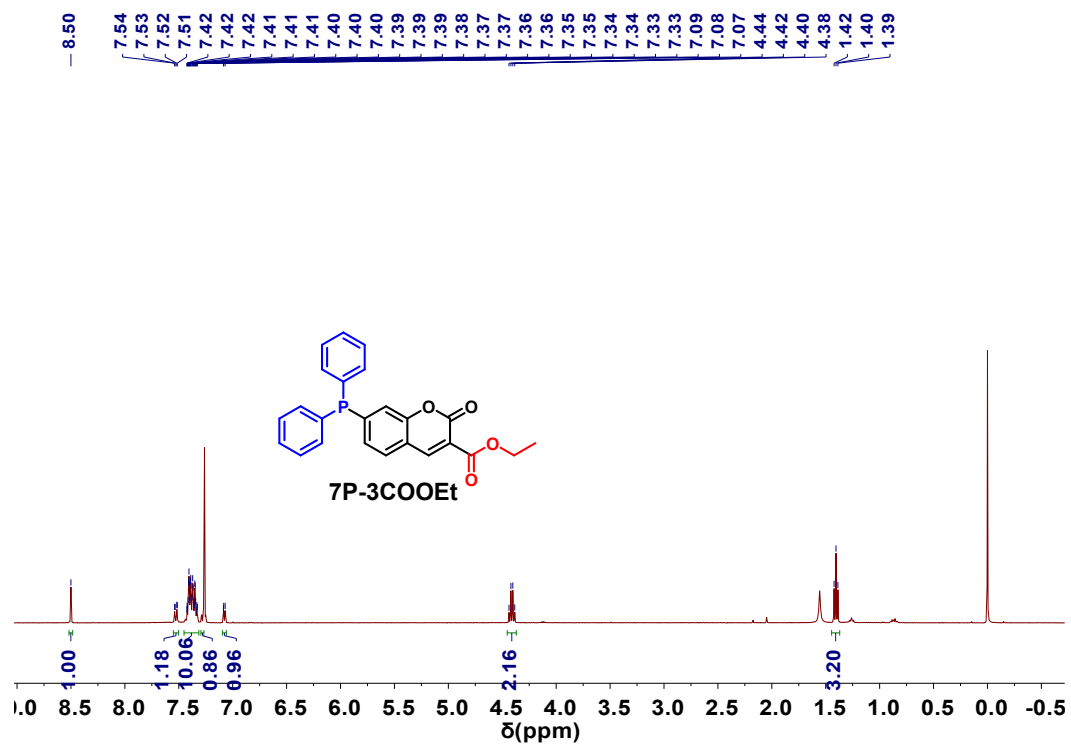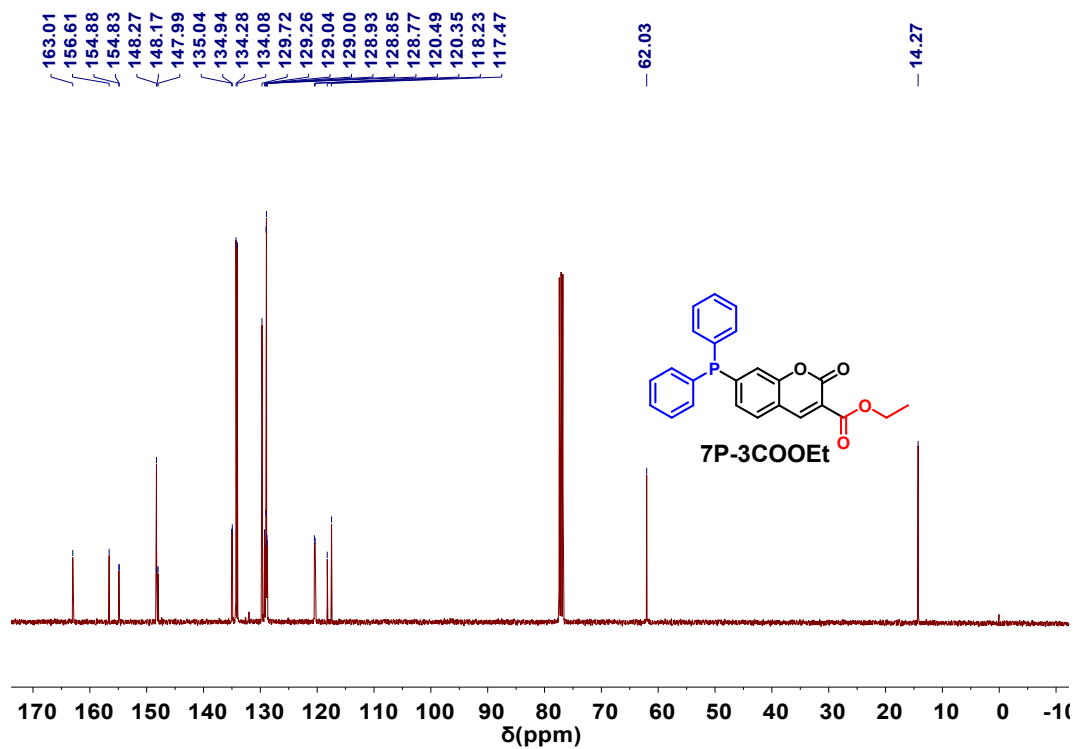

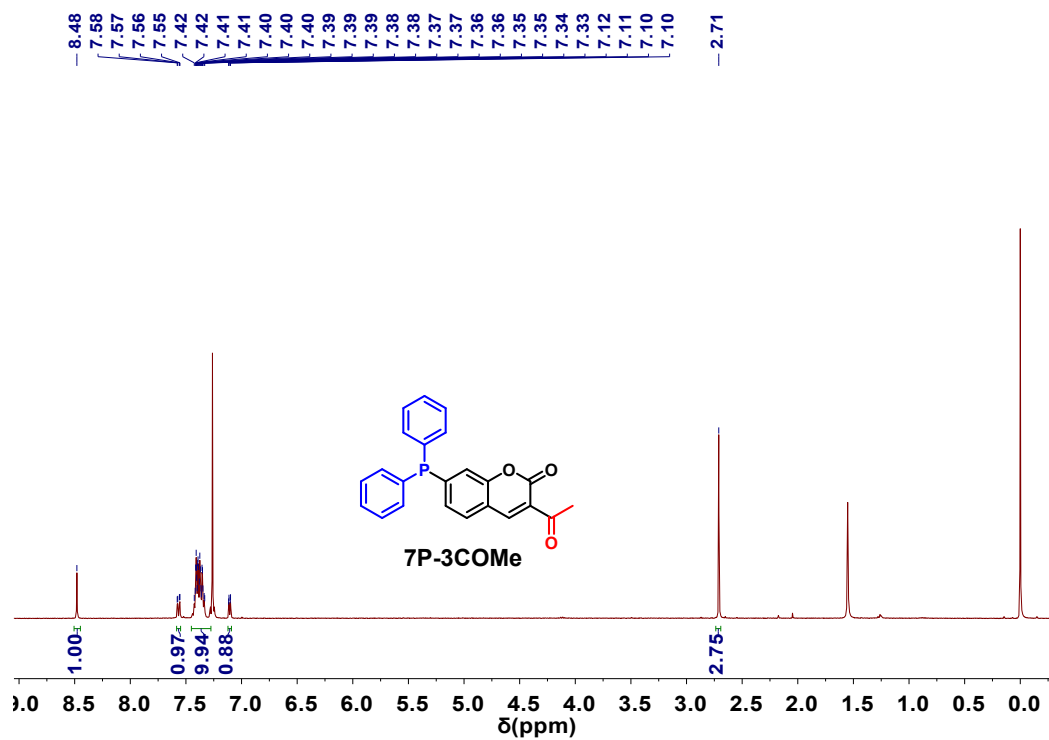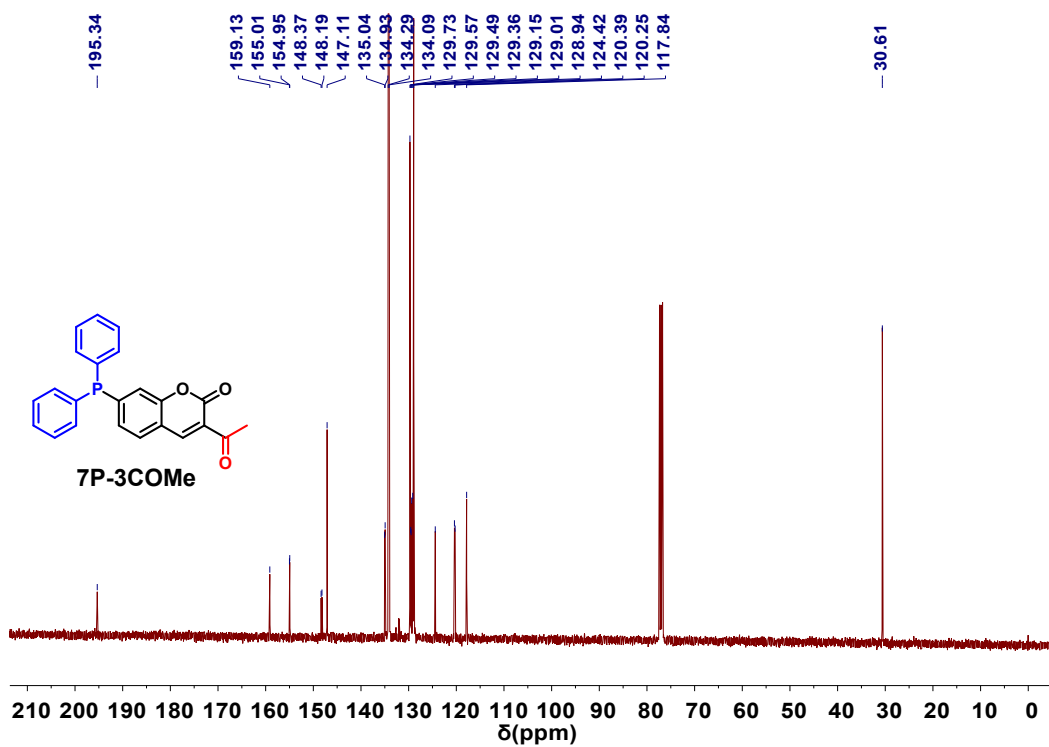

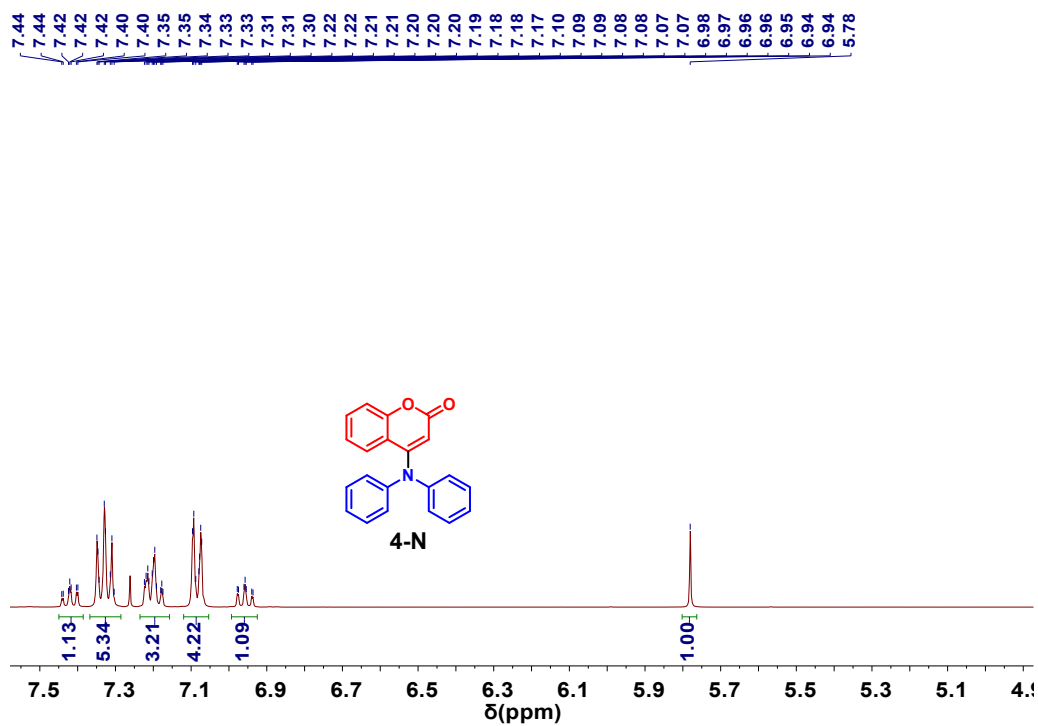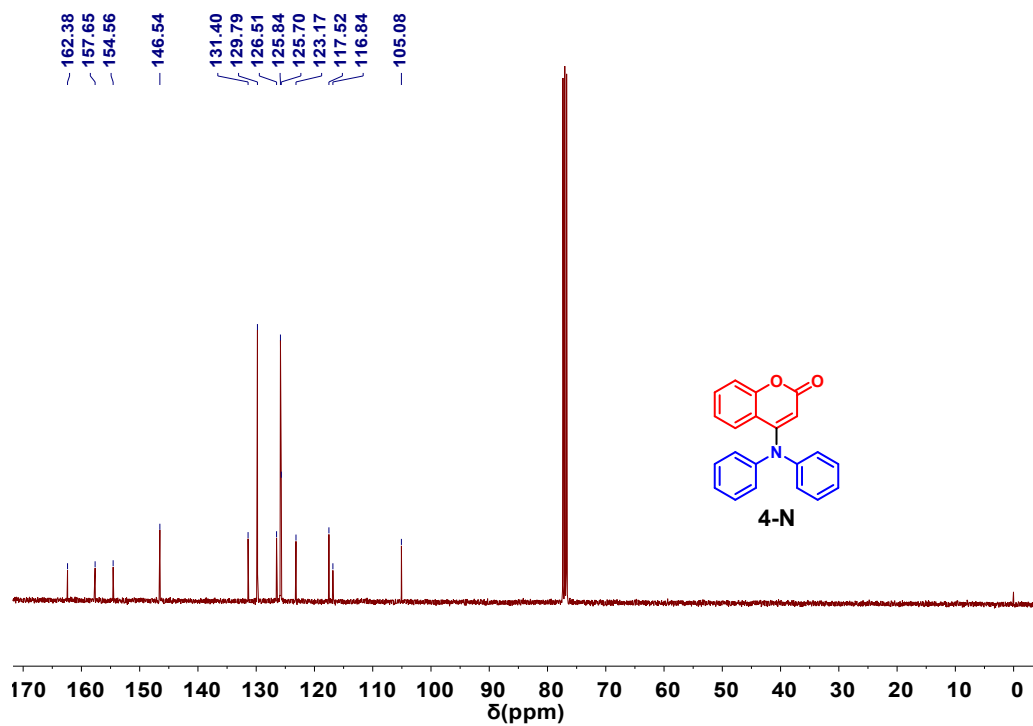

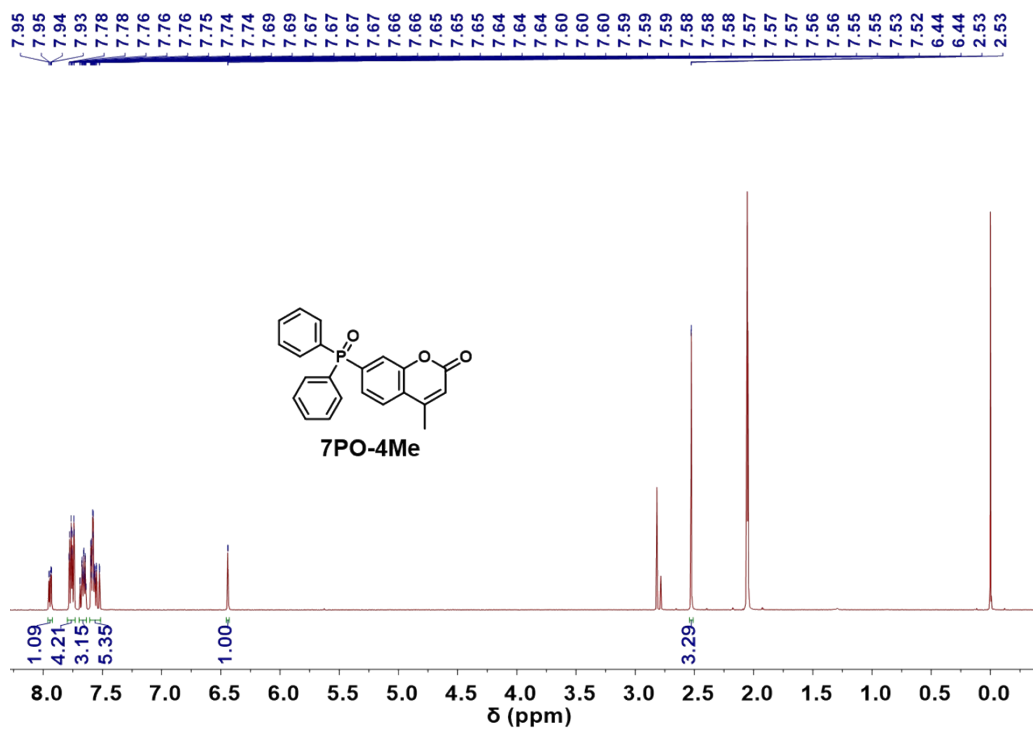

Supplement: d1tc05810j2.pdf [file d1tc05810j2.pdf]
